# Supplementary material
Source: publisher figshare collection journal article supplement (https://acs.figshare.com/ndownloader/files/20781627)

## Supporting Information

### Design and Optimization of 3'-(imidazo[1,2-a]pyrazin-3-yl)-[1,1'-biphenyl]-3-carboxamides as Selective DDR1 Inhibitors

Cheng Mo <sup>†, ‡, #</sup>, Zhang Zhang<sup>†, #</sup>, Yupeng Li<sup>‡, §, #</sup>, Minhao Huang<sup>‡</sup>, Jian Zou<sup>†</sup>, Jinfeng Luo<sup>‡</sup>, Zheng-Chao Tu<sup>‡</sup>, Yong Xu<sup>‡</sup>, Xiaomei Ren<sup>‡, \*</sup>, Ke Ding<sup>†, \*</sup>, Xiaoyun Lu<sup>†, \*</sup>

<sup>†</sup>International Cooperative Laboratory of Traditional Chinese Medicine Modernization and Innovative Drug Development, Ministry of Education (MOE) of PR China, College of Pharmacy, Jinan University, 601 Huangpu Avenue West, Guangzhou 510632, China

<sup>‡</sup>Guangzhou Institutes of Biomedicine and Health, Chinese Academy of Sciences, 190 Kaiyuan Avenue, Guangzhou 510530, China

<sup>§</sup>Masonic Cancer Center, University of Minnesota, Minneapolis, Minnesota 55455, United States

#### Contents of SI

|                                                                                        |               |
|----------------------------------------------------------------------------------------|---------------|
| <b>Synthetic procedures for compounds 8a-8w</b>                                        | <b>S1-23</b>  |
| <b>The results of the selectivity profiling study of compound 8v</b>                   | <b>S24-28</b> |
| <b>Active-site dependent competition binding assay–Kinome<sup>scan</sup> Screening</b> | <b>S29</b>    |
| <b><i>In vitro</i> kinase assay</b>                                                    | <b>S29-30</b> |
| <b>Colony formation assay</b>                                                          | <b>S30</b>    |
| <b>Inhibition on H1299 cell proliferation by MTT assay</b>                             | <b>S30-31</b> |
| <b>Wound healing assay</b>                                                             | <b>S31</b>    |
| <b>Transwell assay</b>                                                                 | <b>S32</b>    |
| <b>Computational study</b>                                                             | <b>S32-33</b> |
| <b>The <sup>1</sup>H and <sup>13</sup>C NMR spectra of compounds 8a-8w</b>             | <b>S33-54</b> |

#### Synthetic procedures for compounds 8a-8w.

Synthesis of the designed compounds **8a-8l** and **8n-8w** was outlined in Scheme S1.

Briefly, the substituted methyl 3'-bromo-[1,1'-biphenyl]-3-carboxylate **13** was prepared by coupling substituted 3-bromophenylboronic acid **9a-9h**, **9k** and **9n-9w** with substituted methyl 3-iodobenzoate **10a**, **10g** and **10h** or by coupling substituted 1-bromo-3-iodobenzene **11i**, **11j** and **11l** with methyl

4-ethyl-3-(4,4,5,5-tetramethyl-1,3,2-dioxaborolan-2-yl)benzoate **12**. **13** was further reacted with bis(pinacolato)diboron to give the intermediate **14**, which underwent the classical Suzuki coupling reaction to yield the key intermediate substituted methyl 3'-(imidazo[1,2-*a*]pyrazin-3-yl)-[1,1'-biphenyl]-3-carboxylate **15**. The designed compounds **8a-8l** and **8n-8w** were obtained by amidation of intermediate **15** with different anilines under basic condition in good or moderate yields.

Scheme 1. Synthesis of Compounds **8a-8l** and **8n-8w**.

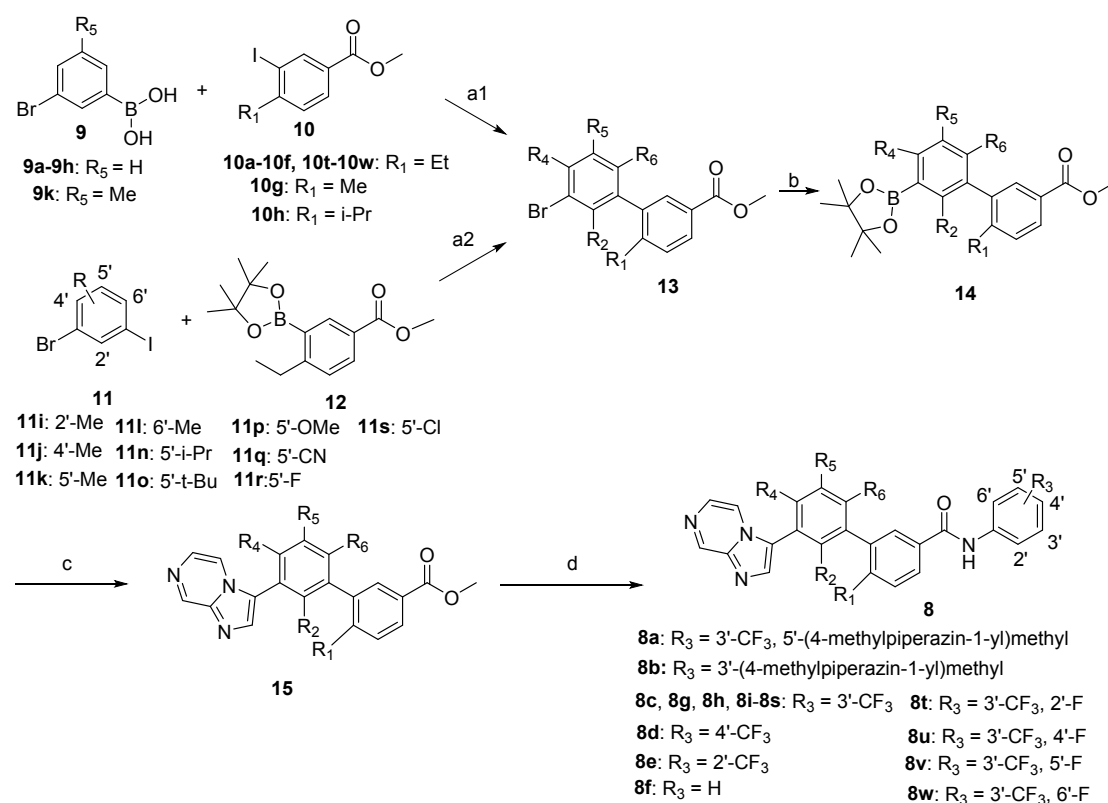

Reagents and conditions: (a1) Pd(PPh<sub>3</sub>)<sub>4</sub>, Na<sub>2</sub>CO<sub>3</sub>, PhMe/H<sub>2</sub>O (3:1), Ar, 90°C, overnight, 58-98%; (a2) Pd(PPh<sub>3</sub>)<sub>4</sub>, K<sub>3</sub>PO<sub>4</sub>, Dioxane, Ar, 90°C, overnight, 55-91%; (b) Pd(dffp)Cl<sub>2</sub>, KOAc, Bis(pinacolato)diboron, Dioxane, Ar, 90°C, overnight, 64-92%; (c) 3-bromoimidazo[1,2-*a*]pyrazine, Pd(PPh<sub>3</sub>)<sub>4</sub>, Na<sub>2</sub>CO<sub>3</sub>, PhMe/H<sub>2</sub>O (3:1), Ar, 90°C, overnight, 42-82%; (d) *t*-BuOK, anilines, dry THF, -20°C, 4-79%.

Synthesis of the designed compound **8m** was outlined in Scheme S2.

Scheme S2. Synthesis of the compound **8m**.

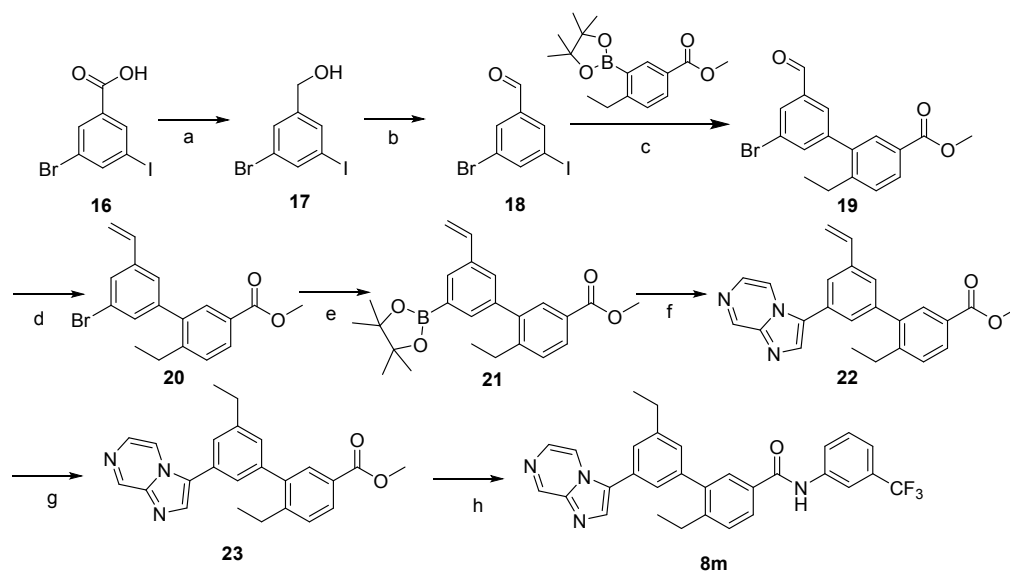

Reagents and conditions: (a)  $\text{BH}_3$  (1M THF solution), THF,  $0^\circ\text{C}$  to rt, 12h, 79%; (b) Dess-Martin periodinane, DCM,  $0^\circ\text{C}$  to rt, 1h, 90%; (c)  $\text{Pd}(\text{PPh}_3)_4$ ,  $\text{K}_3\text{PO}_4$ , Dioxane, Ar,  $90^\circ\text{C}$ , overnight, 64%; (d) Methyltriphenylphosphonium bromide, n-BuLi (2.4M THF solution), THF,  $-20^\circ\text{C}$  for 0.5h, overnight at rt, 50%; (e)  $\text{Pd}(\text{dppf})\text{Cl}_2$ , KOAc, Bis(pinacolato)diboron, Dioxane, Ar,  $90^\circ\text{C}$ , overnight, 38%; (f) 3-bromoimidazo[1,2-a]pyrazine,  $\text{Pd}(\text{PPh}_3)_4$ ,  $\text{Na}_2\text{CO}_3$ , PhMe/ $\text{H}_2\text{O}$  (3:1), Ar,  $90^\circ\text{C}$ , overnight, 79%; (g) 10% Pd/C,  $\text{H}_2$ , MeOH, rt, 4h, 50%; (h) t-BuOK, 3-(trifluoromethyl)aniline, dry THF,  $-20^\circ\text{C}$ , 8%.

**General Methods for Chemistry.** All reagents and solvents were purchased from commercial sources without further purification. Flash chromatography was performed using 300 mesh silica gel. All reactions were monitored by thin-layer chromatography (TLC) using silica gel plates with fluorescence F254 and UV light visualization.  $^1\text{H}$  NMR spectra were recorded on a Bruker AV-400 spectrometer at 400 MHz or a Bruker AV-500 spectrometer at 500 MHz.  $^{13}\text{C}$  NMR spectra were recorded on a Bruker AV-500 spectrometer at 125 MHz. Coupling constants ( $J$ ) are expressed in hertz (Hz). Chemical shifts ( $\delta$ ) of NMR are reported in parts per million (ppm) units relative to an internal standard (TMS). Low resolution ESI-MS were recorded on an Agilent 1200 HPLC-MSD mass spectrometer and high resolution ESI-MS on an Applied Biosystems Q-STAR Elite ESI-LC-MS/MS mass spectrometer. Purity of compounds was determined by reverse-phase high

performance liquid chromatography [HPLC, Dionex Summit HPLC (Column: Diamonsil C18, 5.0  $\mu$ m, 4.6  $\times$  250 mm (Dikma Technologies); detector: PDA-100 photodiode array; injector: ASI-100 autoinjector; pump: p-680A)] to be >95%. A flow rate of 1.0 mL/min was used with mobile phase of 85%MeOH in H<sub>2</sub>O with 0.1% modifier (ammonia, v/v).

**Methyl 3'-bromo-6-ethyl-[1,1'-biphenyl]-3-carboxylate (13a)**

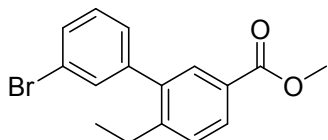

To a solution of methyl 4-ethyl-3-iodo-benzoate (6.0 g, 20.66 mmol, 1.0 eq) in toluene/water (v/v, 3:1, 40 mL) was added 3-bromophenylboronic acid (4.36 g, 21.69 mmol, 1.05 eq), Pd(PPh<sub>3</sub>)<sub>4</sub> (1.2 g, 1.03 mmol, 0.05 eq), Na<sub>2</sub>CO<sub>3</sub> (6.58 g, 61.99 mmol, 3.0eq). The mixture was degassed and purged again with argon, then heated at 90°C overnight. After cooling, the solvent was evaporated under reduced pressure. The residue was dissolved in DCM, washed with water and saturated salt water, dried over Na<sub>2</sub>SO<sub>4</sub>. The organic layer was concentrated and purified by column chromatography (PE/EA) through silica gel afforded the intermediate **13a** (3.8 g, yield: 58%). <sup>1</sup>H NMR (400 MHz, DMSO-*d*<sub>6</sub>):  $\delta$ (ppm) 7.98 (d, *J* = 8.0 Hz, 1H), 7.85 (s, 1H), 7.51 (d, *J* = 8.0 Hz, 1H), 7.47 (s, 1H), 7.38 (d, *J* = 8.0 Hz, 1H), 7.29 (t, *J* = 8.0 Hz, 1H), 7.23 (d, *J* = 7.6 Hz, 1H), 3.91 (s, 3H), 2.63 (q, *J* = 3.6 Hz, 2H), 1.12 (t, *J* = 3.6 Hz, 3H).

**Methyl 6-ethyl-3'-(4,4,5,5-tetramethyl-1,3,2-dioxaborolan-2-yl)-[1,1'-biphenyl]-3-carboxylate (14a)**

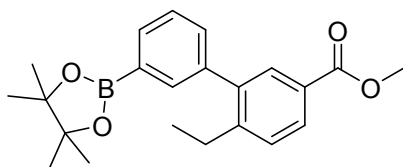

To a solution of **13a** (2.61 g, 8.17 mmol, 1.0 eq) in dry dioxane (14 mL) was added bis(pinacolato)diboron (3.11 g, 12.26 mmol, 1.5 eq), Pd(dppf)Cl<sub>2</sub> (0.30 g, 0.41 mmol, 0.05 eq), KOAc (2.41 g, 24.52 mmol, 3.0 eq). The mixture was degassed and purged again with argon, then heated at 90°C overnight. After cooling, the solvent was evaporated under reduced pressure. The residue was dissolved in DCM and filtered.

The filtrate was concentrated and purified by column chromatography (PE/EA) to give the intermediate **14a** (1.91 g, yield: 64%). <sup>1</sup>H NMR (400 MHz, DMSO-*d*<sub>6</sub>): δ(ppm) 7.95 (d, *J* = 8.0 Hz, 1H), 7.88 (s, 1H), 7.81 (d, *J* = 6.8 Hz, 1H), 7.74 (s, 1H), 7.44-7.38 (m, 2H), 7.36 (t, *J* = 8.0 Hz, 1H), 3.89 (s, 3H), 2.62 (q, *J* = 3.6 Hz, 2H), 1.35 (s, 12H), 1.10 (t, *J* = 3.6 Hz, 3H).

**Methyl 6-ethyl-3'-(imidazo[1,2-*a*]pyrazin-3-yl)-[1,1'-biphenyl]-3-carboxylate (15a)**

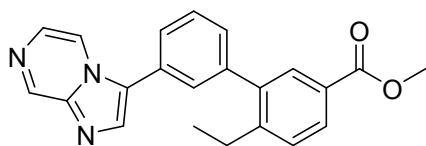

To a solution of **14a** (1.91 g, 5.23 mmol, 1.0 eq) and 3-bromoimidazo[1,2-*a*]pyrazine (0.98 g, 4.96 mmol, 0.95 eq) in Toluene/water (v/v, 3:1, 20ml) was added Pd(PPh<sub>3</sub>)<sub>4</sub> (0.30 g, 0.26 mmol, 0.05 eq) and Na<sub>2</sub>CO<sub>3</sub> (1.66 g, 15.68 mmol, 3.0 eq). The mixture was degassed and purged again with argon, then heated at 90°C overnight. After cooling, the solvent was evaporated under reduced pressure. The residue was dissolved in DCM and filtered. The filtrate was concentrated and purified by column chromatography (PE/EA) through silica gel to give the intermediate **15a** (0.96 g, yield: 52%). <sup>1</sup>H NMR (400 MHz, DMSO-*d*<sub>6</sub>): δ(ppm) 9.16 (s, 1H), 8.29 (d, *J* = 4.8 Hz, 1H), 8.00 (d, *J* = 12.0 Hz, 1H), 7.93-7.91 (m, 3H), 7.64-7.60 (m, 2H), 7.52 (s, 1H), 7.43-7.41 (m, 2H), 3.90 (s, 3H), 2.69 (q, *J* = 7.6 Hz, 2H), 1.10 (t, *J* = 7.6 Hz, 3H).

**3-((4-methylpiperazin-1-yl)methyl)-5-(trifluoromethyl)phenyl-6-ethyl-3'-(imidazo[1,2-*a*]pyrazin-3-yl)-[1,1'-biphenyl]-3-carboxylate (8a)**

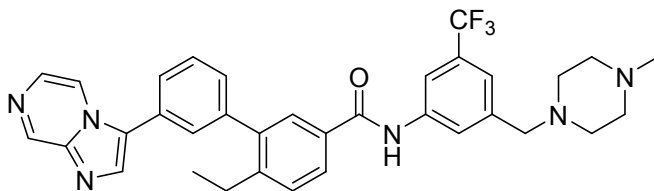

To a solution of **15a** (0.14 g, 0.39 mmol, 1.0 eq) and 3-((4-methylpiperazin-1-yl)methyl)-5-(trifluoromethyl)aniline (0.11 g, 0.39 mmol, 1.0 eq) in dry THF (5.0 mL) was added *t*-BuOK (0.17 g, 1.56 mmol, 4.0 eq) in portions at -20°C. The ice bath was removed after 1 hr. The reaction mixture was stirred at rt for

another 2h. The mixture was diluted with EA, washed with water and dried with anhydrous  $\text{Na}_2\text{SO}_4$ . The organic layer was concentrated. Purification by column chromatography (DCM/Methanol) through silica gel afforded the intermediate (0.077g, yield: 33 %).  $^1\text{H}$  NMR (400 MHz,  $\text{CDCl}_3$ ):  $\delta$ (ppm) 9.13 (s, 1H), 8.29 (d,  $J$  = 7.6 Hz, 1H), 8.24 (s, 1H), 7.93-7.91 (m, 3H), 7.88 (dd,  $J$  = 8.0 Hz, 1.6 Hz, 1H), 7.80 (s, 2H), 7.65-7.59 (m, 2H), 7.53 (s, 1H), 7.48 (d,  $J$  = 8.0 Hz, 1H), 7.44 (dd,  $J$  = 7.2 Hz, 1.6 Hz, 1H), 7.34 (s, 1H), 3.55 (s, 2H), 2.71 (q,  $J$  = 7.6 Hz, 2H), 2.58 (br, 8H), 2.37 (s, 3H), 1.18 (t,  $J$  = 7.6 Hz, 3H).  $^{13}\text{C}$  NMR (125 MHz,  $\text{CDCl}_3$ ):  $\delta$ (ppm) 165.64, 146.08, 144.39, 142.22, 141.26, 140.87, 140.45, 138.75, 134.54, 131.93, 131.24, 129.99, 129.77, 129.43, 129.29, 128.74, 128.30, 127.78, 126.86, 126.60, 123.84, 123.68, 121.34, 116.29, 115.90, 62.21, 54.83, 52.77, 45.73, 26.24, 15.33. MS (ESI),  $m/z$ : 599  $[\text{M}+\text{H}]^+$ . Purity: 98.18%, Rt 9.78 min.

**6-ethyl-3'-(imidazo[1,2-*a*]pyrazin-3-yl)-*N*-(3-((4-methylpiperazin-1-yl)methyl)phenyl)-[1,1'-biphenyl]-3-carboxamide (8b)**

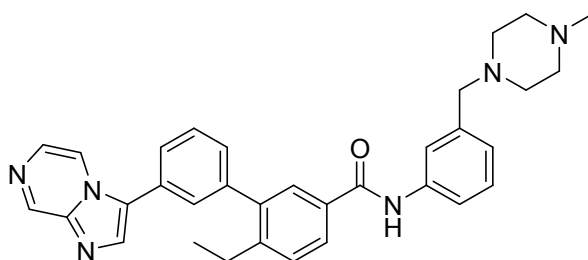

Compound **8b** was prepared following similar procedure of **8a**, yield 20%.  $^1\text{H}$  NMR (500 MHz,  $\text{CDCl}_3$ ):  $\delta$ (ppm) 9.10 (s, 1H), 8.27 (d,  $J$  = 4.3 Hz, 1H), 8.22 (s, 1H), 7.89 (d,  $J$  = 5.3 Hz, 2H), 7.85 (d,  $J$  = 8.1 Hz, 1H), 7.78 (s, 1H), 7.64 – 7.55 (m, 3H), 7.53 (s, 1H), 7.50 (s, 1H), 7.43 (t,  $J$  = 8.6 Hz, 2H), 7.27 (dd,  $J$  = 10.2, 5.3 Hz, 1H), 7.06 (d,  $J$  = 7.5 Hz, 1H), 3.46 (s, 2H), 2.68 (q,  $J$  = 7.5 Hz, 2H), 2.48 (br, 8H), 2.25 (s, 3H), 1.15 (t,  $J$  = 7.5 Hz, 3H).  $^{13}\text{C}$  NMR (125 MHz,  $\text{CDCl}_3$ ):  $\delta$ (ppm) 165.49, 145.87, 144.67, 142.48, 141.49, 141.05, 139.34, 138.14, 134.80, 132.67, 130.17, 129.94, 129.58, 129.38, 129.04, 128.82, 128.54, 128.02, 126.77, 125.53, 120.96, 119.25, 116.44, 62.94, 55.07, 53.12, 46.01, 26.40, 15.54. HRMS (ESI) calcd for  $\text{C}_{33}\text{H}_{34}\text{N}_6\text{O}$   $[\text{M}+\text{H}]^+$ : 531.2866; found 531.2858. HPLC purity= 96.36%, Rt 13.26 min.

**6-ethyl-3'-(imidazo[1,2-*a*]pyrazin-3-yl)-*N*-(3-(trifluoromethyl)phenyl)-[1,1'-biphe**

**nyl]-3-carboxamide (8c)**

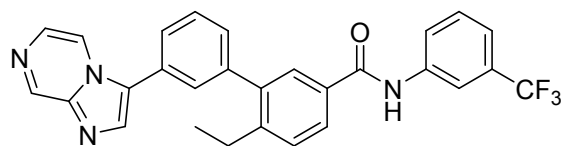

Compound **8c** was prepared following similar procedure of **8a**, yield 72%. <sup>1</sup>H NMR (400 MHz, CDCl<sub>3</sub>): δ(ppm) 9.14 (s, 1H), 8.28 (d, *J* = 4.4 Hz, 1H), 8.05 (s, 1H), 7.91-7.93 (m, 3H), 7.86-7.89 (m, 2H), 7.78 (d, *J* = 1.6 Hz, 1H), 7.66-7.60 (m, 2H), 7.53-7.44 (m, 4H), 7.40 (d, *J* = 0.4 Hz, 1H), 2.71 (q, *J* = 7.5 Hz, 2H), 1.18 (t, *J* = 7.5 Hz, 3H). <sup>13</sup>C NMR (125 MHz, CDCl<sub>3</sub>): δ(ppm) 165.70, 146.35, 144.67, 142.38, 141.50, 141.18, 138.76, 134.77, 132.12, 130.20, 129.93, 129.74, 129.64, 129.53, 128.85, 128.49, 128.04, 126.88, 126.83, 126.76, 123.44, 121.17, 121.14, 117.11, 117.08, 116.42, 26.45, 15.51. HRMS (ESI) calcd for C<sub>28</sub>H<sub>21</sub>F<sub>3</sub>N<sub>4</sub>O [M+H]<sup>+</sup> : 487.1740; found 487.1747. HPLC purity= 97.96%, Rt 6.57 min.

**6-ethyl-3'-(imidazo[1,2-*a*]pyrazin-3-yl)-N-(4-(trifluoromethyl)phenyl)-[1,1'-biphenyl]-3-carboxamide (8d)**

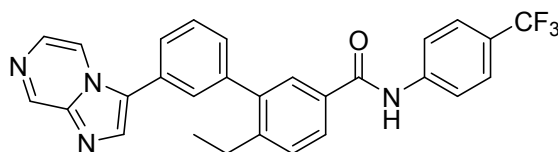

Compound **8c** was prepared following similar procedure of **8a**, yield 72%. <sup>1</sup>H NMR (400 MHz, CDCl<sub>3</sub>): δ(ppm) 9.11 (s, 1H), 8.27-8.26 (s, 2H), 7.91-7.86 (m, 3H), 7.79-7.77 (m, 3H), 7.63-7.58 (m, 4H), 7.49-7.46 (m, 2H), 7.44-7.42 (m, 1H), 2.70 (q, *J* = 7.4 Hz, 2H), 1.17 (t, *J* = 7.5 Hz, 3H). <sup>13</sup>C NMR (125 MHz, CDCl<sub>3</sub>): δ(ppm) 165.88, 146.33, 144.55, 142.35, 141.41, 141.07, 134.68, 132.13, 130.15, 129.91, 129.53, 128.93, 128.38, 127.92, 127.00, 126.74, 126.36, 126.13, 125.26, 123.10, 120.00, 116.41, 26.41, 15.49. HRMS (ESI) calcd for C<sub>28</sub>H<sub>22</sub>F<sub>3</sub>N<sub>4</sub>O [M+H]<sup>+</sup>: 487.1740; found 487.1747. HPLC purity= 97.12%, Rt 11.14 min.

**6-ethyl-3'-(imidazo[1,2-*a*]pyrazin-3-yl)-N-(2-(trifluoromethyl)phenyl)-[1,1'-biphenyl]-3-carboxamide (8e)**

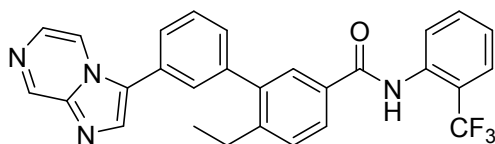

Compound **8d** was prepared following similar procedure of **8a**, yield 63%. <sup>1</sup>H NMR (400 MHz, CDCl<sub>3</sub>): δ(ppm) 9.17 (s, 1H), 8.42 (d, *J* = 8.2 Hz, 1H), 8.31 (d, *J* = 4.3 Hz, 1H), 8.26 (s, 1H), 7.94-7.93 (m, 2H), 7.83-7.81 (m, 2H), 7.67-7.60 (m, 4H), 7.55 (s, 1H), 7.51 (d, *J* = 8.2 Hz, 1H), 7.46 (d, *J* = 6.8 Hz, 1H), 7.27 (t, *J* = 7.3 Hz, 1H), 2.72 (q, *J* = 7.4 Hz, 2H), 1.18 (t, *J* = 7.5 Hz, 3H). <sup>13</sup>C NMR (125 MHz, CDCl<sub>3</sub>): δ(ppm) 165.27, 146.52, 144.75, 142.31, 141.50, 135.63, 134.87, 133.17, 132.05, 130.19, 129.91, 129.62, 129.07, 128.50, 128.15, 126.94, 126.74, 126.28, 124.67, 124.42, 116.42, 26.45, 15.49. HRMS (ESI) calcd for C<sub>28</sub>H<sub>21</sub>F<sub>3</sub>N<sub>4</sub>O [M+H]<sup>+</sup>: 487.1740; found 487.1744. HPLC purity= 97.96%, Rt 6.57 min.

**6-ethyl-3'-(imidazo[1,2-*a*]pyrazin-3-yl)-*N*-phenyl-[1,1'-biphenyl]-3-carboxamide (8f)**

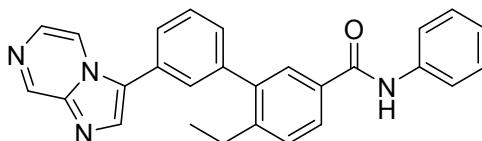

Compound **8f** was prepared following similar procedure of **8a**, yield 47%. <sup>1</sup>H NMR (400 MHz, CDCl<sub>3</sub>): δ(ppm) 9.13 (d, *J* = 1.2 Hz, 1H), 8.28 (dd, *J* = 4.7, 1.4 Hz, 1H), 8.01 – 7.88 (m, 3H), 7.85 (dd, *J* = 8.0, 1.9 Hz, 1H), 7.78 (d, *J* = 1.8 Hz, 1H), 7.66 – 7.59 (m, 4H), 7.52 (s, 1H), 7.44 (dd, *J* = 11.8, 4.9 Hz, 2H), 7.35 (t, *J* = 7.9 Hz, 2H), 7.14 (t, *J* = 7.4 Hz, 1H), 2.70 (q, *J* = 7.5 Hz, 2H), 1.17 (t, *J* = 7.5 Hz, 3H). <sup>13</sup>C NMR (125 MHz, CDCl<sub>3</sub>): δ(ppm) 165.63, 145.79, 144.58, 142.46, 141.42, 140.96, 138.17, 134.73, 132.68, 130.12, 129.92, 129.54, 129.31, 129.11, 128.87, 128.45, 127.93, 126.98, 126.61, 124.60, 120.45, 116.42, 26.36, 15.53. HRMS (ESI) calcd for C<sub>27</sub>H<sub>21</sub>N<sub>4</sub>O [M+H]<sup>+</sup> : 419.1866; found 419.1863. HPLC purity= 96.36%, Rt 13.26 min.

**3'-(imidazo[1,2-*a*]pyrazin-3-yl)-6-methyl-*N*-(3-(trifluoromethyl)phenyl)-[1,1'-biphenyl]-3-carboxamide (8g)**

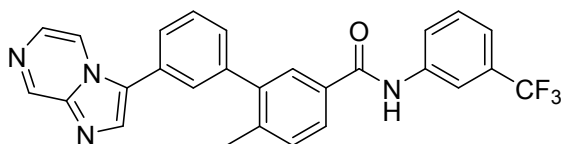

Compound **8g** was prepared following similar procedure of **8a**, yield 65%. <sup>1</sup>H NMR (400 MHz, CDCl<sub>3</sub>): δ (ppm) 9.14 (s, 1H), 8.29 (d, *J* = 4.4 Hz, 1H), 8.09 (s, 1H), 7.92-7.91 (m, 3H), 7.88 (d, *J* = 8.2 Hz, 1H), 7.83-7.81 (m, 2H), 7.67-7.59 (m, 2H), 7.53 (s, 1H), 7.50-7.43 (m, 3H), 7.39 (d, *J* = 8.0 Hz, 1H), 2.39 (s, 3H). <sup>13</sup>C NMR (125 MHz, CDCl<sub>3</sub>): δ(ppm) 165.70, 144.65, 142.37, 141.49, 141.19, 138.76, 134.75, 132.37, 131.23, 130.19, 129.92, 129.73, 129.68, 128.69, 128.52, 128.09, 126.87, 126.77, 126.59, 123.46, 121.16, 117.10, 116.43, 20.74. MS (ESI), *m/z*: 507 [M+Cl]<sup>+</sup>. HRMS (ESI) calcd for C<sub>27</sub>H<sub>19</sub>F<sub>3</sub>N<sub>4</sub>O [M+H]<sup>+</sup>: 473.1584; found 473.1578. Purity: 96.03%, Rt 6.82 min.

**3'-(imidazo[1,2-*a*]pyrazin-3-yl)-6-isopropyl-N-(3-(trifluoromethyl)phenyl)-[1,1'-biphenyl]-3-carboxamide (**8h**)**

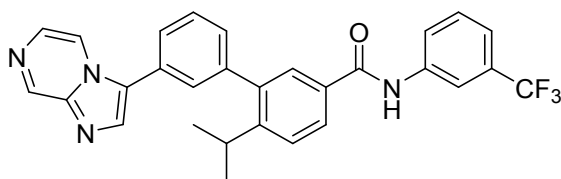

Compound **8h** was prepared following similar procedure of **8a**, yield 7%. <sup>1</sup>H NMR (500 MHz, CDCl<sub>3</sub>): δ (ppm) 9.03 (d, *J* = 1.1 Hz, 1H), 8.69 (s, 1H), 8.23 (dd, *J* = 4.7, 1.2 Hz, 1H), 7.94 – 7.91 (m, 2H), 7.89 (d, *J* = 8.5 Hz, 1H), 7.86 (d, *J* = 4.7 Hz, 1H), 7.83 (s, 1H), 7.79 (d, *J* = 1.8 Hz, 1H), 7.58 (dt, *J* = 15.3, 7.7 Hz, 2H), 7.51 (d, *J* = 8.2 Hz, 1H), 7.45 – 7.40 (m, 2H), 7.37 (dd, *J* = 11.5, 7.7 Hz, 2H), 3.13-3.08 (m, *J* = 6.8 Hz, 1H), 1.20 (d, *J* = 6.8 Hz, 6H). <sup>13</sup>C NMR (126 MHz, CDCl<sub>3</sub>): δ(ppm) 165.79, 151.04, 144.60, 142.49, 141.45, 140.50, 138.83, 134.71, 131.84, 131.63, 131.38, 130.16, 129.99, 129.64, 128.86, 128.45, 127.92, 127.20, 126.75, 126.73, 125.04, 123.47, 122.87, 121.08, 117.11, 116.40, 29.93, 24.16. HRMS (ESI) calcd for C<sub>29</sub>H<sub>23</sub>F<sub>3</sub>N<sub>4</sub>O [M+H]<sup>+</sup>: 501.1897; found 501.1919. HPLC purity= 96.77%, Rt 11.95 min.

**6-ethyl-3'-(imidazo[1,2-*a*]pyrazin-3-yl)-2'-methyl-N-(3-(trifluoromethyl)phenyl)-[1,1'-biphenyl]-3-carboxamide (**8i**)**

### 1,1'-biphenyl]-3-carboxamide (8i)

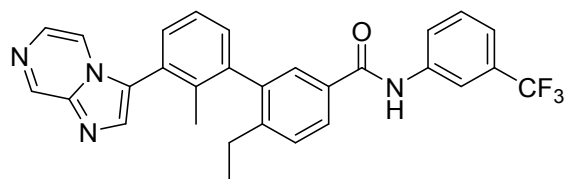

The title compound was synthesized following the procedure for compound **8a** substituting **13a** with **13i** (prepared by the method outlined below).

<sup>1</sup>H NMR (400 MHz, CDCl<sub>3</sub>): δ(ppm) 9.14 (d, *J* = 1.3 Hz, 1H), 8.16 (s, 1H), 7.92 (s, 1H), 7.90 – 7.86 (m, 3H), 7.83 (s, 1H), 7.75 (dd, *J* = 4.6, 1.4 Hz, 1H), 7.71 (d, *J* = 1.9 Hz, 1H), 7.50-7.46 (m, 2H), 7.42-7.38 (m, 3H), 7.31 (dd, *J* = 6.8, 2.1 Hz, 1H), 2.58-2.44 (m, 2H), 1.82 (s, 3H), 1.13 (t, *J* = 7.6 Hz, 3H). <sup>13</sup>C NMR (125 MHz, CDCl<sub>3</sub>): δ(ppm) 165.81, 146.58, 144.25, 142.02, 141.06, 140.89, 138.82, 136.13, 135.22, 132.11, 131.36, 1301.49, 129.89, 129.70, 129.11, 128.55, 127.41, 126.76, 126.31, 125.03, 123.58, 122.86, 121.07, 117.28, 116.75, 26.39, 17.49, 14.92. HRMS (ESI) calcd for C<sub>29</sub>H<sub>23</sub>F<sub>3</sub>N<sub>4</sub>O [M+H]<sup>+</sup> : 501.1897; found 501.1914. HPLC purity= 99.57%, Rt 8.08 min.

### methyl 3'-bromo-6-ethyl-2'-methyl-[1,1'-biphenyl]-3-carboxylate (13i)

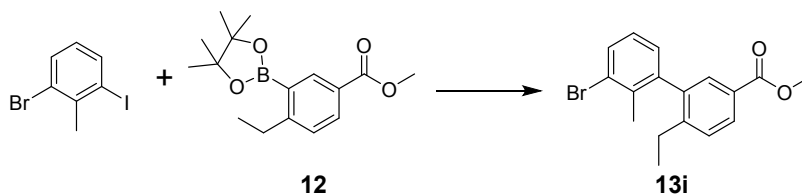

### methyl 4-ethyl-3-(4,4,5,5-tetramethyl-1,3,2-dioxaborolan-2-yl)benzoate (12)

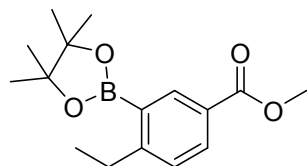

The title compound was synthesized following the procedure of compound **14a** starting with methyl 4-ethyl-3-iodobenzoate. <sup>1</sup>H NMR (400 MHz, CDCl<sub>3</sub>): δ(ppm) 8.41 (s, 1H), 8.0 (d, *J* = 8.0 Hz, 1H), 7.25 (d, *J* = 8.0 Hz, 1H), 3.90 (s, 3H), 2.96 (q, *J* = 7.6, 2H), 1.20 (t, *J* = 7.6 Hz, 3H).

### methyl 3'-bromo-6-ethyl-2'-methyl-[1,1'-biphenyl]-3-carboxylate (13i)

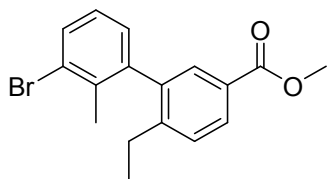

To a solution of methyl 4-ethyl-3-(4,4,5,5-tetramethyl-1,3,2-dioxaborolan-2-yl)benzoate (**12**) (1.95g, 6.72mmol, 1.0eq) in dioxane (11mL) was added 1-bromo-3-iodo-2-methylbenzene (2.0g, 6.72mmol, 1.0eq), Pd(PPh<sub>3</sub>)<sub>4</sub> (0.39g, 0.34mmol, 0.05eq), K<sub>3</sub>PO<sub>4</sub> (5.38g, 20.16mmol, 3.0eq). The mixture was degassed and purged again with argon, then heated at 90°C overnight. After cooling, the solvent was evaporated under reduced pressure. The residue was dissolved in DCM, washed with water and saturated salt water, dried with Na<sub>2</sub>SO<sub>4</sub>. The organic layer was concentrated. Purification by column chromatography (PE/EA) through silica gel afforded the intermediate **13i** (1.8g, yield: 80.37%). <sup>1</sup>H NMR (400 MHz, CDCl<sub>3</sub>): δ(ppm) 7.97-7.93 (m, 2H), 7.37-7.32 (m, 2H), 7.22 (d, *J* = 8.0 Hz, 1H), 7.12 (s, 1H), 3.90 (s, 3H), 2.70 (q, *J* = 8.0, 2H), 2.18 (s, 3H), 0.97 (t, *J* = 8.0 Hz, 3H).

**6-ethyl-3'-(imidazo[1,2-*a*]pyrazin-3-yl)-4'-methyl-*N*-(3-(trifluoromethyl)phenyl)-[1,1'-biphenyl]-3-carboxamide (**8j**)**

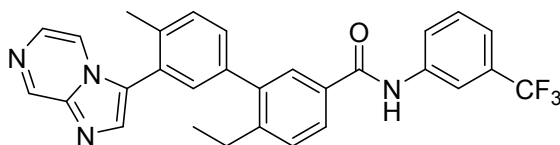

Compound **8j** was prepared following similar procedure of **8i**, yield 13%. <sup>1</sup>H NMR (400 MHz, CDCl<sub>3</sub>): δ (ppm) 9.13 (d, *J* = 1.3 Hz, 1H), 8.12 (s, 1H), 7.91 (s, 1H), 7.88 (t, *J* = 6.5 Hz, 2H), 7.83 (dd, *J* = 7.3, 2.7 Hz, 2H), 7.78 (dd, *J* = 4.7, 1.5 Hz, 1H), 7.76 (d, *J* = 2.0 Hz, 1H), 7.48 (d, *J* = 8.0 Hz, 2H), 7.45 (d, *J* = 8.0 Hz, 1H), 7.42 – 7.36 (m, 2H), 7.31 (d, *J* = 1.7 Hz, 1H), 2.70 (q, *J* = 7.5 Hz, 2H), 2.23 (s, 3H), 1.16 (t, *J* = 7.5 Hz, 3H). <sup>13</sup>C NMR (125 MHz, CDCl<sub>3</sub>): δ (ppm) 165.85, 146.35, 144.29, 140.95, 139.29, 138.83, 137.24, 135.20, 132.06, 131.63, 131.26, 130.65, 129.90, 129.68, 129.38, 129.01, 126.71, 125.82, 125.03, 123.48, 122.86, 121.06, 117.11, 116.73, 26.42, 19.62, 15.47. HRMS (ESI) calcd for C<sub>29</sub>H<sub>23</sub>F<sub>3</sub>N<sub>4</sub>O [M+H]<sup>+</sup> : 501.18967; found 501.18929. HPLC purity= 99.89%, Rt 8.52 min.

**6-ethyl-3'-(imidazo[1,2-*a*]pyrazin-3-yl)-5'-methyl-*N*-(3-(trifluoromethyl)phenyl)-[1,1'-biphenyl]-3-carboxamide (8k)**

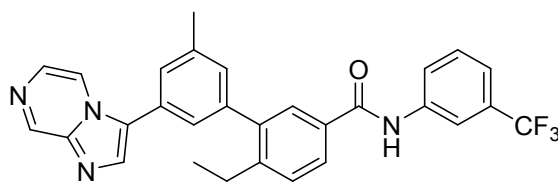

Compound **8k** was prepared following similar procedure of **8a**, yield 4%. <sup>1</sup>H NMR (400 MHz, CDCl<sub>3</sub>): δ (ppm) 9.07 (d, *J* = 1.3 Hz, 1H), 8.38 (s, 1H), 8.24 (dd, *J* = 4.7, 1.4 Hz, 1H), 7.93 (s, 1H), 7.90 – 7.85 (m, 4H), 7.78 (d, *J* = 1.9 Hz, 1H), 7.48-7.44 (m, 2H), 7.39-7.38 (m, 2H), 7.27 (s, 1H), 7.23 (s, 1H), 2.69 (q, *J* = 7.6 Hz, 2H), 2.49 (s, 3H), 1.17 (t, *J* = 7.6 Hz, 3H). <sup>13</sup>C NMR (125 MHz, CDCl<sub>3</sub>): δ(ppm) 165.86, 146.25, 144.53, 142.28, 141.38, 141.21, 139.65, 138.89, 134.63, 132.04, 130.75, 130.09, 129.69, 129.41, 128.84, 127.77, 127.48, 126.91, 125.45, 123.47, 121.05, 117.12, 116.49, 26.43, 21.62, 15.51. HRMS (ESI) calcd for C<sub>29</sub>H<sub>23</sub>F<sub>3</sub>N<sub>4</sub>O [M+H]<sup>+</sup> : 501.1897; found 501.1893. HPLC purity= 99.47%, Rt 9.66 min.

**6-ethyl-5'-(imidazo[1,2-*a*]pyrazin-3-yl)-2'-methyl-*N*-(3-(trifluoromethyl)phenyl)-[1,1'-biphenyl]-3-carboxamide (8l)**

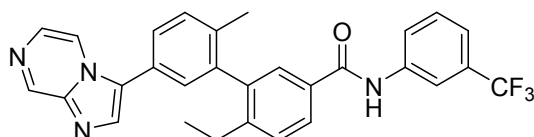

Compound **8k** was prepared following similar procedure of **8a**, yield 4%. <sup>1</sup>H NMR (500 MHz, CDCl<sub>3</sub>): δ(ppm) 8.99 (d, *J* = 1.3 Hz, 1H), 8.78 (s, 1H), 8.16 (dd, *J* = 4.6, 1.4 Hz, 1H), 7.94 (s, 1H), 7.91 (dd, *J* = 11.1, 5.0 Hz, 2H), 7.81 (d, *J* = 4.7 Hz, 1H), 7.77 (s, 1H), 7.74 (d, *J* = 1.7 Hz, 1H), 7.43 (dd, *J* = 14.9, 8.0 Hz, 4H), 7.35 (d, *J* = 7.4 Hz, 1H), 7.23 (s, 1H), 2.56-2.42 (m, 2H), 2.11 (s, 3H), 1.10 (t, *J* = 7.5 Hz, 3H). <sup>13</sup>C NMR (125 MHz, CDCl<sub>3</sub>): δ(ppm) 166.04, 146.77, 144.64, 141.87, 141.50, 140.66, 139.09, 137.64, 134.63, 132.31, 132.07, 131.82, 131.55, 131.30, 130.22, 129.87, 129.38, 128.77, 128.59, 127.30, 127.00, 125.32, 125.24, 123.69, 123.07, 121.22, 120.91, 117.35, 116.62, 26.55, 20.25, 15.17. HRMS (ESI) calcd for C<sub>29</sub>H<sub>23</sub>F<sub>3</sub>N<sub>4</sub>O [M+H]<sup>+</sup> : 501.1897; found 501.1892. HPLC purity= 98.73%, Rt 8.76 min.

**6-ethyl-3'-(imidazo[1,2-*a*]pyrazin-3-yl)-5'-isopropyl-*N*-(3-(trifluoromethyl)phenyl)-[1,1'-biphenyl]-3-carboxamide (8m)**

**)-[1,1'-biphenyl]-3-carboxamide (8n)**

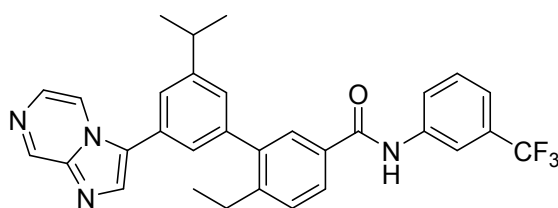

Compound **8n** was prepared following similar procedure of **8i**, with 1-bromo-3-iodo-5-isopropylbenzene as starting material, yield 6%. <sup>1</sup>H NMR (400 MHz, CDCl<sub>3</sub>): δ(ppm) 9.10 (s, 1H), 8.30 - 8.21 (m, 2H), 7.93 (s, 1H), 7.88 (d, *J* = 10.0 Hz, 4H), 7.80 (s, 1H), 7.51 - 7.44 (m, 2H), 7.43 (s, 1H), 7.39 (d, *J* = 7.7 Hz, 1H), 7.30 (d, *J* = 5.1 Hz, 2H), 3.09-3.02 (m, 1H), 2.70 (q, *J* = 7.5 Hz, 2H), 1.35 (d, *J* = 6.9 Hz, 6H), 1.19 (t, *J* = 7.5 Hz, 3H). <sup>13</sup>C NMR (125 MHz, CDCl<sub>3</sub>): δ(ppm) 165.87, 150.66, 146.33, 144.55, 142.30, 141.44, 138.85, 134.64, 132.07, 131.64, 131.38, 130.09, 129.69, 129.45, 128.86, 128.62, 128.25, 127.85, 127.13, 126.82, 125.85, 125.10, 123.48, 122.88, 121.04, 117.12, 116.47, 34.32, 26.48, 24.08, 15.58. HRMS (ESI) calcd for C<sub>31</sub>H<sub>27</sub>F<sub>3</sub>N<sub>4</sub>O [M+H]<sup>+</sup> : 529.2209; found 529.2211. HPLC purity= 99.55%, Rt 11.40 min.

**1-bromo-3-iodo-5-isopropylbenzene**

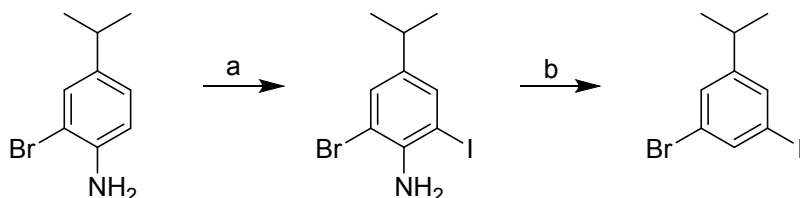

**a.** To a solution of 2-bromo-4-isopropylaniline (10g, 46.72mmol, 1.0eq) in DCM (66.6mL)/MeOH (26.65ml) was added CaCO<sub>3</sub> (8.13 g, 81.30 mmol, 1.74 eq) and benzyltrimethylammonium dichloroiodate (21.77 g, 2.60 mmol, 1.34 eq). The mixture was stirred at reflux for 3 h then cooled to ambient temperature, filtered. The filtration was concentrated under vacuum. Purification by column chromatography (PE/EA) through silica gel afforded the desired product 2-bromo-6-iodo-4-isopropylaniline (5.0 g, yield: 31%). <sup>1</sup>H NMR (400 MHz, CDCl<sub>3</sub>): δ(ppm) 7.45 (s, 1H), 7.27 (s, 1H), 4.43 (brs, 2H), 2.69-2.78 (m, 1H), 1.18 (d, *J* = 7 Hz, 6H).

**b.** To a solution of 2-bromo-6-iodo-4-isopropylaniline (5.0g, 14.83mmol, 1.0eq) in toluene (7.8mL) and EtOH (23.6mL) was slowly added conc. H<sub>2</sub>SO<sub>4</sub> (2.2ml) and

NaNO<sub>2</sub> (2.23g, 32.63mmol, 2.2eq). The mixture was stirred at reflux for 1.5h. The solvent was evaporated. The residue was dissolved in EA, then washed with water. The organic layer was concentrated under vacuum. Purification by column chromatography (PE/EA) through silica gel afforded the desired product 1-bromo-3-iodo-5-isopropylbenzene (2.31 g, yield: 48 %). <sup>1</sup>H NMR (400 MHz, CDCl<sub>3</sub>): δ(ppm) 7.75 (s, 1H), 7.62 (s, 1H), 7.47 (s, 1H), 2.90–2.83 (m, 1H), 1.16 (d, J = 6.8 Hz, 6H).

**3'-(tert-butyl)-6-ethyl-5'-(imidazo[1,2-a]pyrazin-3-yl)-N-(3-(trifluoromethyl)phenyl)-[1,1'-biphenyl]-3-carboxamide (8o)**

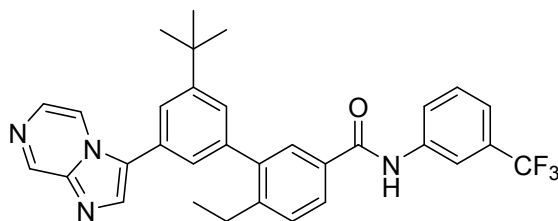

Compound **8o** was prepared following similar procedure of **8i** using 1-bromo-3-(tert-butyl)-5-iodobenzene as starting material, yield 62%. <sup>1</sup>H NMR (500 MHz, CDCl<sub>3</sub>): δ (ppm) 9.10 (s, 1H), 8.24 (s, 2H), 7.91-7.87 (m, 5H), 7.81 (s, 1H), 7.58 (s, 1H), 7.48-7.45 (m, 3H), 7.38 (d, J = 7.3 Hz, 1H), 7.30 (s, 1H), 2.69 (q, J = 7.4 Hz, 2H), 1.42 (s, 9H), 1.19 (t, J = 7.4 Hz, 3H). <sup>13</sup>C NMR (125 MHz, CDCl<sub>3</sub>): δ(ppm) 166.08, 153.15, 146.57, 144.72, 142.16, 141.85, 141.54, 139.04, 134.79, 132.27, 132.06, 131.80, 131.54, 131.29, 130.28, 129.88, 129.68, 129.08, 127.77, 127.54, 125.74, 125.23, 124.24, 123.70, 13.06, 121.25, 117.30, 116.62, 35.35, 31.63, 26.69, 15.83. HRMS (ESI) calcd for C<sub>32</sub>H<sub>29</sub>F<sub>3</sub>N<sub>4</sub>O [M+H]<sup>+</sup> : 543.2366; found 543.2364. HPLC purity= 99.90%, Rt 14.22 min.

**1-bromo-3-(tert-butyl)-5-iodobenzene**

n-BuLi (1.6M THF solution, 11.77 mL, 18.83 mmol, 1.1 eq) was added to the solution of 1,3-dibromo-5-(tert-butyl)benzene (5.0 g, 17.12 mmol, 1.0 eq) in dry THF (142 mL) at -78°C. The mixture was stirred at this temperature for 1 h, then a solution of 1,2-diiodoethane (5.85 g, 20.54 mmol, 1.2 eq) in dry THF (7.0 ml) was slowly added to the mixture. The temperature was allowed to rise to -45°C in 4.5 h. Then, the cool bath was removed, and the mixture was stirred at room temperature for 2.5 h.

After that, the reaction was quenched with sat.  $\text{Na}_2\text{S}_2\text{O}_3$  aqueous solution, extracted with EA, washed with water and sat.  $\text{NaCl}$  aqueous solution. The organic layer was concentrated under vacuum. Purification by column chromatography (PE/EA) through silica gel afforded the desired product 1-bromo-3-iodo-5-isopropylbenzene (2.15 g, yield: 37%).  $^1\text{H}$  NMR (400 MHz,  $\text{CDCl}_3$ ):  $\delta$ (ppm) 7.67 (s, 1H), 7.62 (s, 1H), 7.46 (s, 1H), 1.28 (s, 9H).

**6-ethyl-3'-(imidazo[1,2-*a*]pyrazin-3-yl)-5'-methoxy-*N*-(3-(trifluoromethyl)phenyl)-[1,1'-biphenyl]-3-carboxamide (8p)**

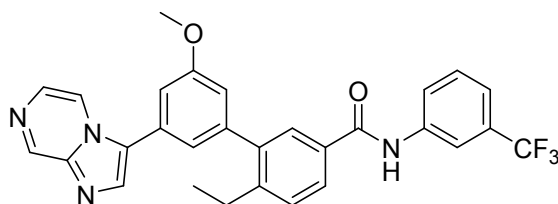

Compound **8p** was prepared following similar procedure of **8i**, yield 12%.  $^1\text{H}$  NMR (400 MHz,  $\text{CDCl}_3$ ):  $\delta$ (ppm) 9.10 (s, 1H), 8.29-8.26 (m, 2H), 7.93 (s, 1H), 7.90 – 7.86 (m, 4H), 7.79 (d,  $J = 2.0$  Hz, 1H), 7.49-7.45 (m, 2H), 7.38 (d,  $J = 7.8$  Hz, 1H), 7.10 – 7.09 (m, 1H), 7.06 (s, 1H), 6.94 (dd,  $J = 2.3, 1.4$  Hz, 1H), 3.90 (s, 3H), 2.71 (q,  $J = 7.5$  Hz, 2H), 1.18 (t,  $J = 7.6$  Hz, 3H).  $^{13}\text{C}$  NMR (125 MHz,  $\text{CDCl}_3$ ):  $\delta$ (ppm) 165.85, 160.34, 146.21, 144.50, 143.70, 141.41, 141.04, 138.91, 134.69, 132.06, 131.61, 131.35, 130.14, 129.67, 129.46, 128.96, 128.69, 127.05, 126.71, 125.04, 123.51, 122.88, 121.04, 120.67, 117.15, 116.57, 115.30, 112.68, 55.70, 26.42, 15.56. HRMS (ESI) calcd for  $\text{C}_{29}\text{H}_{23}\text{F}_3\text{N}_4\text{O}_2$   $[\text{M}+\text{H}]^+$  : 517.1846; found 517.1847. HPLC purity= 99.85%,  $R_t$  8.09 min.

**3'-cyano-6-ethyl-5'-(imidazo[1,2-*a*]pyrazin-3-yl)-*N*-(3-(trifluoromethyl)phenyl)-[1,1'-biphenyl]-3-carboxamide (8q)**

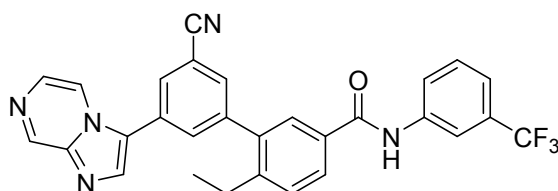

Compound **8p** was prepared following similar procedure of **8i** using 3-bromo-5-iodobenzonitrile as starting material, yield 20%.  $^1\text{H}$  NMR (400 MHz,  $\text{CDCl}_3$ ):  $\delta$ (ppm) 9.21 (s, 1H), 8.27 (dd,  $J = 4.7, 1.4$  Hz, 1H), 8.13 (s, 1H), 8.03 (d,  $J =$

4.7 Hz, 1H), 7.99 (s, 1H), 7.93 – 7.90 (m, 4H), 7.82 – 7.80 (m, 2H), 7.73 (t,  $J = 1.5$  Hz, 1H), 7.55-7.49 (m, 2H), 7.43 (d,  $J = 7.8$  Hz, 1H), 2.70 (q,  $J = 7.5$  Hz, 2H), 1.21 (t,  $J = 7.5$  Hz, 3H).  $^{13}\text{C}$  NMR (125 MHz,  $\text{CDCl}_3$ ):  $\delta(\text{ppm})$  165.16, 146.17, 145.12, 143.82, 141.93, 139.07, 138.49, 135.63, 132.93, 132.37, 131.83, 131.57, 130.92, 129.84, 128.94, 127.41, 125.02, 124.45, 123.47, 121.43, 117.82, 117.11, 116.08, 114.34, 26.43, 15.46. HRMS (ESI) calcd for  $\text{C}_{29}\text{H}_{20}\text{F}_3\text{N}_5\text{O}$   $[\text{M}+\text{H}]^+$  : 512.1692; found 512.1693. HPLC purity= 99.44%, Rt 6.61 min.

### 3-bromo-5-iodobenzonitrile

3-bromo-5-iodobenzoic acid (5.82 g, 17.80 mmol, 1.0 eq) was dissolved in  $\text{SOCl}_2$  (25mL). The resulting mixture was stirred at  $81^\circ\text{C}$  for 2h, then concentrated. The residual liquid was poured into ammonium hydroxide solution (~28%, 100mL) and stirred at room temperature for 3h. After that, the reaction mixture was filtrated, and the filter cake was dried under vacuum. Then, the dried solid was dissolved in  $\text{SOCl}_2$  (25mL), and the resulting mixture was stirred under reflux for 18h. After that, the reaction mixture was concentrated, and the residue was dissolved in EA and washed with sat. sodium bicarbonate aqueous solution. The organic layer was concentrated under vacuum. Purification by column chromatography (PE/EA) through silica gel afforded the desired product 1-bromo-3-iodo-5-isopropylbenzene (4.25g, yield: 77 %).  $^1\text{H}$  NMR (400 MHz,  $\text{CDCl}_3$ ):  $\delta(\text{ppm})$  8.11 (s, 1H), 7.92 (s, 1H), 7.76 (s, 1H).

### 6-ethyl-3'-fluoro-5'-(imidazo[1,2-*a*]pyrazin-3-yl)-N-(3-(trifluoromethyl)phenyl)-[1,1'-biphenyl]-3-carboxamide (8r)

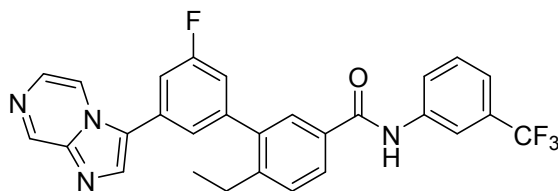

Compound **8r** was prepared following similar procedure of **8i**, yield 79%.  $^1\text{H}$  NMR (400 MHz,  $\text{CDCl}_3$ ):  $\delta(\text{ppm})$  9.15 (d,  $J = 1.4$  Hz, 1H), 8.28 (dd,  $J = 4.7, 1.5$  Hz, 1H), 8.12 (s, 1H), 7.95 (d,  $J = 4.7$  Hz, 1H), 7.92-7.91 (m, 2H), 7.90 – 7.86 (m, 2H), 7.78 (d,  $J = 1.9$  Hz, 1H), 7.50-7.46 (m, 2H), 7.39 (d,  $J = 7.8$  Hz, 1H), 7.34 – 7.31 (m, 2H), 7.17 – 7.13 (m, 1H), 2.71 (q,  $J = 7.5$  Hz, 2H), 1.19 (t,  $J = 7.6$  Hz, 3H).  $^{13}\text{C}$  NMR (125

MHz, CDCl<sub>3</sub>):  $\delta$ (ppm) 165.43, 163.88, 161.89, 146.05, 144.63, 144.49, 144.42, 141.51, 139.88, 138.57, 134.98, 132.10, 131.55, 131.29, 130.37, 129.79, 129.72, 129.61, 129.47, 128.61, 127.09, 125.47, 124.88, 124.10, 123.36, 122.72, 121.07, 117.54, 116.98, 116.95, 116.87, 116.70, 113.59, 113.41, 26.25, 15.33. HRMS (ESI) calcd for C<sub>28</sub>H<sub>20</sub>F<sub>4</sub>N<sub>4</sub>O [M+H]<sup>+</sup> : 505.1646; found 505.1649. HPLC purity= 99.98%, Rt 12.9 min.

**3'-chloro-6-ethyl-5'-(imidazo[1,2-*a*]pyrazin-3-yl)-*N*-(3-(trifluoromethyl)phenyl)-[1,1'-biphenyl]-3-carboxamide (8s)**

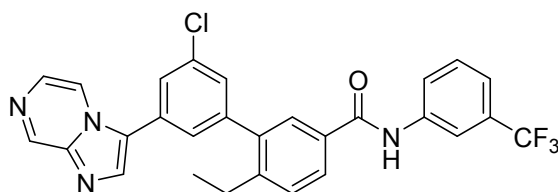

Compound **8s** was prepared following similar procedure of **8i**, yield 15%. <sup>1</sup>H NMR (400 MHz, CDCl<sub>3</sub>):  $\delta$ (ppm) 9.15 (d, *J* = 1.4 Hz, 1H), 8.26 (dd, *J* = 4.7, 1.4 Hz, 1H), 8.13 (s, 1H), 7.96 (d, *J* = 4.7 Hz, 1H), 7.92 (s, 2H), 7.90 – 7.86 (m, 2H), 7.77 (d, *J* = 1.9 Hz, 1H), 7.60 (t, *J* = 1.7 Hz, 1H), 7.50-7.46 (m, 2H), 7.43-7.39 (m, 3H), 2.70 (q, *J* = 7.5 Hz, 2H), 1.19 (t, *J* = 7.5 Hz, 3H). <sup>13</sup>C NMR (126 MHz, CDCl<sub>3</sub>):  $\delta$ (ppm) 165.58, 146.15, 144.71, 144.00, 141.60, 139.77, 138.72, 135.56, 135.10, 132.23, 131.52, 131.37, 131.07, 130.50, 129.92, 129.39, 128.78, 127.33, 126.58, 125.40, 125.01, 123.51, 122.85, 121.16, 117.14, 116.34, 26.38, 15.44. HRMS (ESI) calcd for C<sub>28</sub>H<sub>20</sub>ClF<sub>3</sub>N<sub>4</sub>O [M+H]<sup>+</sup> : 521.1351; found 521.1347. HPLC purity= 99.71%, Rt 9.9 min.

Compounds **8t-8w** were synthesized according to procedures for compound **8k** with corresponding substituted aniline.

**6-ethyl-*N*-(2-fluoro-3-(trifluoromethyl)phenyl)-3'-(imidazo[1,2-*a*]pyrazin-3-yl)-5'-methyl-[1,1'-biphenyl]-3-carboxamide (8t)**

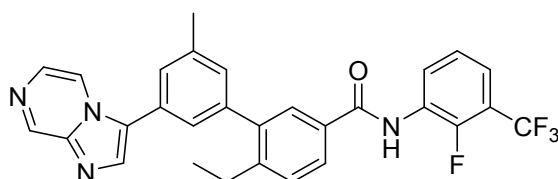

Compound **8t** was prepared following similar procedure of **8k**, yield 71%. <sup>1</sup>H NMR

(400 MHz, CDCl<sub>3</sub>): δ(ppm) 9.14 (d, *J* = 1.3 Hz, 1H), 8.70 (t, *J* = 7.6 Hz, 1H), 8.29 (dd, *J* = 4.7, 1.4 Hz, 1H), 8.17 (s, 1H), 7.92-7.91 (m, 2H), 7.86 (dd, *J* = 8.0, 2.0 Hz, 1H), 7.77 (d, *J* = 1.9 Hz, 1H), 7.49 (d, *J* = 8.1 Hz, 1H), 7.43 (s, 1H), 7.37 – 7.27 (m, 3H), 7.27 (s, 1H), 2.72 (q, *J* = 7.5 Hz, 2H), 2.52 (s, 3H), 1.18 (t, *J* = 7.5 Hz, 3H). <sup>13</sup>C NMR (125 MHz, CDCl<sub>3</sub>): δ(ppm) 165.41, 146.74, 144.68, 142.13, 141.53, 139.67, 134.80, 131.63, 130.71, 130.10, 129.52, 128.91, 128.13, 127.72, 127.60, 126.85, 126.67, 125.81, 125.62, 124.64, 121.58, 120.96, 116.49, 26.47, 21.63, 15.48. HRMS (ESI) calcd for C<sub>29</sub>H<sub>22</sub>F<sub>4</sub>N<sub>4</sub>O [M+H]<sup>+</sup>: 519.1803; found 519.1811. HPLC purity= 97.31%, Rt 8.03 min.

**6-ethyl-*N*-(4-fluoro-3-(trifluoromethyl)phenyl)-3'-(imidazo[1,2-*a*]pyrazin-3-yl)-5'-methyl-[1,1'-biphenyl]-3-carboxamide (8u)**

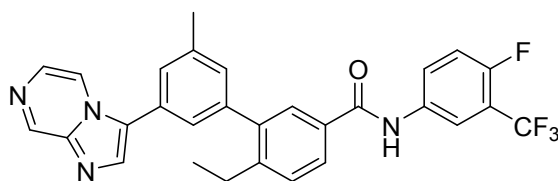

Compound **8t** was prepared following similar procedure of **8k**, yield 40%. <sup>1</sup>H NMR (400 MHz, CDCl<sub>3</sub>): δ(ppm) 9.08 (d, *J* = 1.3 Hz, 1H), 8.38 (s, 1H), 8.24 (dd, *J* = 4.7, 1.4 Hz, 1H), 7.92 – 7.82 (m, 5H), 7.77 (d, *J* = 1.9 Hz, 1H), 7.46 (d, *J* = 8.1 Hz, 1H), 7.38 (s, 1H), 7.26 (s, 1H), 7.23 (s, 1H), 7.18 (t, *J* = 9.6 Hz, 1H), 2.70 (q, *J* = 7.5 Hz, 2H), 2.50 (s, 3H), 1.17 (t, *J* = 7.5 Hz, 3H). <sup>13</sup>C NMR (125 MHz, CDCl<sub>3</sub>): δ(ppm) 165.94, 157.15, 155.13, 146.33, 144.42, 142.25, 141.25, 139.66, 134.54, 131.77, 130.74, 130.07, 129.40, 128.85, 127.69, 127.45, 126.94, 125.84, 125.39, 123.50, 121.33, 119.22, 117.56, 117.39, 116.50, 26.41, 21.59, 15.47. HRMS (ESI) calcd for C<sub>29</sub>H<sub>22</sub>F<sub>4</sub>N<sub>4</sub>O [M+H]<sup>+</sup> : 519.1803; found 519.1798. HPLC purity= 97.99%, Rt 9.25 min.

**6-ethyl-*N*-(3-fluoro-5-(trifluoromethyl)phenyl)-3'-(imidazo[1,2-*a*]pyrazin-3-yl)-5'-methyl-[1,1'-biphenyl]-3-carboxamide (8v)**

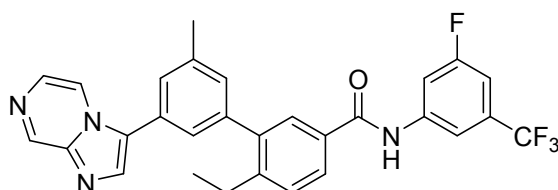

Compound **8t** was prepared following similar procedure of **8k**, yield 61%. <sup>1</sup>H NMR (400 MHz, CDCl<sub>3</sub>): δ(ppm) 9.09 (d, *J* = 1.4 Hz, 1H), 8.39 (s, 1H), 8.24 (dd, *J* = 4.7, 1.4 Hz, 1H), 7.91-7.85 (m, 4H), 7.76 (d, *J* = 2.0 Hz, 1H), 7.58 (s, 1H), 7.48 (d, *J* = 8.1 Hz, 1H), 7.39 (s, 1H), 7.26 (s, 1H), 7.24 (s, 1H), 7.09 (d, *J* = 8.1 Hz, 1H), 2.70 (q, *J* = 7.5 Hz, 2H), 2.51 (s, 3H), 1.17 (t, *J* = 7.5 Hz, 3H). <sup>13</sup>C NMR (125 MHz, CDCl<sub>3</sub>): δ(ppm) 165.99, 163.87, 161.90, 146.52, 144.42, 142.20, 141.25, 140.79, 139.69, 134.52, 131.68, 130.73, 130.09, 129.47, 128.86, 127.68, 127.48, 127.01, 125.34, 116.49, 112.55, 110.96, 110.75, 108.32, 108.21, 107.83, 26.43, 21.61, 15.47. HRMS (ESI) calcd for C<sub>29</sub>H<sub>22</sub>F<sub>4</sub>N<sub>4</sub>O [M+H]<sup>+</sup> : 519.1803; found 519.1816. HPLC purity= 98.07%, Rt 11.37 min.

**6-ethyl-*N*-(2-fluoro-5-(trifluoromethyl)phenyl)-3'-(imidazo[1,2-*a*]pyrazin-3-yl)-5'-methyl-[1,1'-biphenyl]-3-carboxamide (**8w**)**

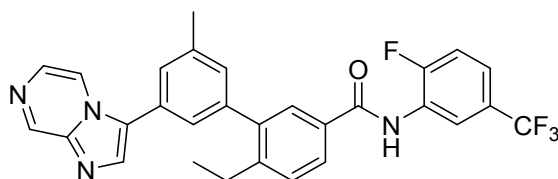

Compound **8t** was prepared following similar procedure of **8k**, yield 58%. <sup>1</sup>H NMR (400 MHz, CDCl<sub>3</sub>): δ(ppm) 9.14 (s, 1H), 8.86 (d, *J* = 6.0 Hz, 1H), 8.30 (d, *J* = 4.6 Hz, 1H), 8.21 (s, 1H), 7.92-7.90 (m, 2H), 7.86 (dd, *J* = 8.0, 1.7 Hz, 1H), 7.78 (d, *J* = 1.5 Hz, 1H), 7.49 (d, *J* = 8.0 Hz, 1H), 7.43 (s, 1H), 7.37 (bs, 1H), 7.33 (s, 1H), 7.26 – 7.21 (m, 2H), 2.72 (q, *J* = 7.5 Hz, 2H), 2.52 (s, 3H), 1.18 (t, *J* = 7.5 Hz, 3H). <sup>13</sup>C NMR (125 MHz, CDCl<sub>3</sub>): δ(ppm) 165.36, 155.25, 153.28, 146.78, 144.69, 142.13, 141.53, 139.70, 134.81, 131.56, 130.74, 130.12, 129.54, 128.90, 128.00, 127.62, 127.33, 126.86, 126.62, 125.62, 124.79, 122.62, 121.73, 119.47, 116.50, 115.52, 115.36, 26.48, 21.64, 15.50. HRMS (ESI) calcd for C<sub>29</sub>H<sub>22</sub>F<sub>4</sub>N<sub>4</sub>O [M+H]<sup>+</sup> : 519.1803; found 519.1815. HPLC purity= 97.85%, Rt 8.12 min.

**Synthesis of compound 8m**

**3-bromo-5-iodobenzaldehyde (**18**)**

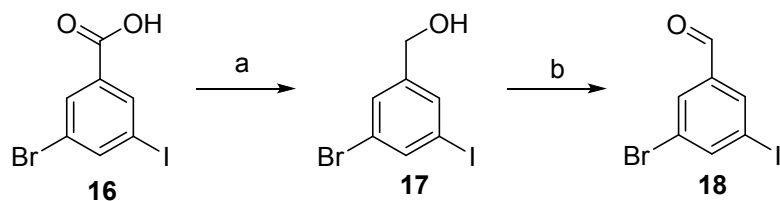

**a.** To a solution of 3-bromo-5-iodobenzoic acid (10 g, 30.59 mmol, 1.0 eq) in dry THF under Ar at 0°C was added 1M BH<sub>3</sub>·THF solution (92 ml, 92 mmol, 3.0 eq). After addition, the ice bath was removed. The mixture was stirred at room temperature overnight. The reaction was quenched by added saturated sodium bicarbonate aqueous solution dropwise. The mixture was extracted with EA. The organic layer was concentrated. Purification by column chromatography (PE/EA) through silica gel afforded the (3-bromo-5-iodophenyl)methanol **17** (6.99 g, yield: 72%). <sup>1</sup>H NMR (400 MHz, CDCl<sub>3</sub>): δ (ppm) 7.77 (s, 1H), 7.65 (s, 1H), 7.48 (s, 1H), 4.64 (s, 2H).

**b.** To a solution of (3-bromo-5-iodophenyl)methanol (**17**) (1.0 g, 3.19 mmol, 1.0 eq) in DCM was added Dess-Martin periodinane (1.63 g, 3.83 mmol, 1.2 eq) in portions. After addition, the ice bath was removed. The mixture was stirred at rt for 1h, and then filtered. The filtrate was concentrated. Purification by column chromatography (PE/EA) through silica gel afforded the 3-bromo-5-iodobenzaldehyde (**18**) (0.8993g, yield: 89%). <sup>1</sup>H NMR (400 MHz, CDCl<sub>3</sub>): δ(ppm) 9.87 (s, 1H), 8.12 (t, *J* = 1.2 Hz, 1H), 8.10 (t, *J* = 1.6 Hz, 1H), 7.96 (t, *J* = 1.6 Hz, 1H).

methyl 3'-bromo-6-ethyl-5'-formyl-[1,1'-biphenyl]-3-carboxylate (**19**)

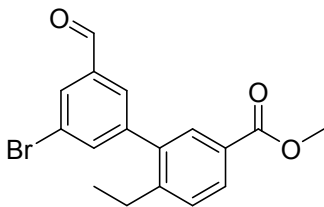

Compound **19** was prepared following similar procedure of **13i**, yield 64%. <sup>1</sup>H NMR (500 MHz, CDCl<sub>3</sub>): δ(ppm) 10.00 (s, 1H), 8.03 (s, 1H), 8.02 (d, *J* = 8.0 Hz, 1H), 7.86 (s, 1H), 7.75 (s, 1H), 7.73 (s, 1H), 7.41 (d, *J* = 8.0 Hz, 1H), 2.62 (q, *J* = 7.5 Hz, 2H), 1.13 (t, *J* = 7.5 Hz, 3H).

methyl 3'-bromo-6-ethyl-5'-vinyl-[1,1'-biphenyl]-3-carboxylate (**20**)

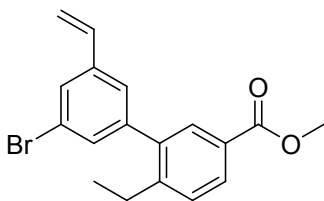

To a solution of methyltriphenylphosphonium bromide (0.95g, 2.65mmol, 3.0eq) in dry THF (12mL) under Ar at -20°C was added n-BuLi (2.66mmol, 2.4M, 3.0eq) dropwise. The mixture was stirred at this temperature for 0.5h. Then a solution of methyl 3'-bromo-6-ethyl-5'-formyl-[1,1'-biphenyl]-3-carboxylate (**19**) (0.31g, 0.88mmol, 1.0eq) in dry THF (1.6mL) was added to the reaction mixture dropwise. After addition, the cool bath was removed, and the mixture was stirred at rt overnight. Saturated NH<sub>4</sub>Cl aqueous solution was added to the mixture dropwise. The mixture was extracted with EA. The organic layer was concentrated. Purification by column chromatography (PE/EA) through silica gel afforded methyl 3'-bromo-6-ethyl-5'-vinyl-[1,1'-biphenyl]-3-carboxylate (**20**) (0.1530g, yield: 50%). <sup>1</sup>H NMR (500 MHz, CDCl<sub>3</sub>): δ(ppm) 7.98 (dd, *J* = 8.0 Hz, 1.6 Hz, 1H), 7.85 (d, *J* = 1.6 Hz, 1H), 7.56 (s, 1H), 7.38 (d, *J* = 8.0 Hz, 1H), 7.34 (s, 1H), 7.25 (s, 1H), 6.68 (dd, *J* = 17.6 Hz, 10.8 Hz, 1H), 7.78 (d, *J* = 17.6 Hz, 1H), 7.78 (d, *J* = 10.8 Hz, 1H), 2.63 (q, *J* = 7.6 Hz, 2H), 1.13 (t, *J* = 7.6 Hz, 3H).

**Methyl 6-ethyl-3'-(4,4,5,5-tetramethyl-1,3,2-dioxaborolan-2-yl)-5'-vinyl-[1,1'-biphenyl]-3-carboxylate (**21**)**

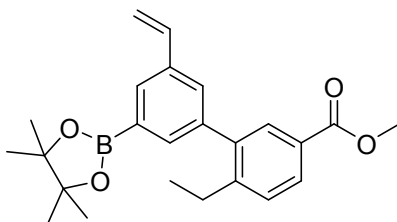

The title compound was synthesized following the procedure of compound **14a** substituting 13a with methyl 3'-bromo-6-ethyl-5'-vinyl-[1,1'-biphenyl]-3-carboxylate (**19**).

<sup>1</sup>H NMR (400 MHz, CDCl<sub>3</sub>): δ(ppm) 7.96 (dd, *J* = 8.0 Hz, 1.6 Hz, 1H), 7.88 (s, 1H), 7.84 (s, 1H), 7.63 (s, 1H), 7.44 (s, 1H), 7.36 (d, *J* = 8.0 Hz, 1H), 6.77 (dd, *J* = 17.6 Hz, 10.8 Hz, 1H), 5.80 (d, *J* = 17.6 Hz, 1H), 5.27 (d, *J* = 10.8 Hz, 1H), 3.91 (s, 3H),

2.63 (q,  $J = 7.6$  Hz, 2H), 1.36 (s, 12H), 1.11 (t,  $J = 7.6$  Hz, 3H).

**Methyl 6-ethyl-3'-(imidazo[1,2-*a*]pyrazin-3-yl)-5'-vinyl-[1,1'-biphenyl]-3-carboxylate (22)**

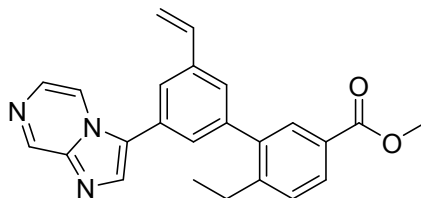

The title compound was synthesized following the procedure of compound **15a** substituting **14a** with methyl 6-ethyl-3'-(4,4,5,5-tetramethyl-1,3,2-dioxaborolan-2-yl)-5'-vinyl-[1,1'-biphenyl]-3-carboxylate (**21**).  $^1\text{H}$  NMR (400 MHz,  $\text{CDCl}_3$ ):  $\delta$ (ppm) 9.16 (s, 1H), 8.28 (s, 1H), 8.01 (dd,  $J = 7.6$  Hz, 1.6 Hz, 1H), 7.94-7.92 (m, 2H), 7.60 (d,  $J = 1.6$  Hz, 1H), 7.47-7.45 (m, 2H), 7.42 (d,  $J = 8.0$  Hz, 1H), 7.40 (d,  $J = 1.6$  Hz, 1H), 6.82 (dd,  $J = 17.6$  Hz, 10.8 Hz, 1H), 5.87 (d,  $J = 17.6$  Hz, 1H), 5.41 (d,  $J = 10.8$  Hz, 1H), 3.91 (s, 3H), 2.69 (q,  $J = 7.6$  Hz, 2H), 1.17 (t,  $J = 7.6$  Hz, 3H).

**Methyl 3',6-diethyl-5'-(imidazo[1,2-*a*]pyrazin-3-yl)-[1,1'-biphenyl]-3-carboxylate (23)**

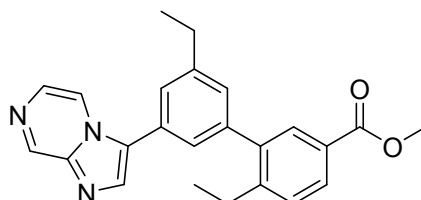

To a solution of methyl 6-ethyl-3'-(imidazo[1,2-*a*]pyrazin-3-yl)-5'-vinyl-[1,1'-biphenyl]-3-carboxylate (0.9g, 2.34mmol, 1.0eq) in MeOH (8ml) was added 10% Pd/C (0.090g). The mixture was degassed and purged with hydrogen and stirred at rt overnight. The solution was filtered and concentrated. Purification by column chromatography (PE/EA) through silica gel afforded the intermediate **23** (0.456g, yield: 51%).  $^1\text{H}$  NMR (400 MHz,  $\text{CDCl}_3$ ):  $\delta$ (ppm) 9.30 (s, 1H), 8.34 (d,  $J = 4.0$  Hz, 1H), 8.04-7.99 (m, 3H), 7.92 (d,  $J = 2.0$  Hz, 1H), 7.43-7.41 (m, 2H), 7.33 (s, 1H), 7.30 (s, 1H), 3.91 (s, 3H), 2.82 (q,  $J = 7.6$  Hz, 2H), 2.68 (q,  $J = 7.2$  Hz, 2H), 1.34 (t,  $J = 7.6$  Hz, 3H), 1.17 (t,  $J = 7.2$  Hz, 3H).

**3',6-diethyl-5'-(imidazo[1,2-a]pyrazin-3-yl)-N-(3-(trifluoromethyl)phenyl)-[1,1'-biphenyl]-3-carboxamide (8m)**

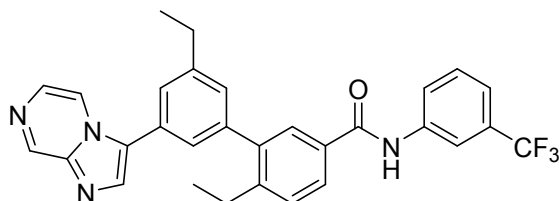

Compound **8m** was prepared following similar procedure of **8a**, yield 8%. <sup>1</sup>H NMR (400 MHz, CDCl<sub>3</sub>): δ(ppm) 9.10 (d, *J* = 1.4 Hz, 1H), 8.26 (dd, *J* = 4.7, 1.5 Hz, 1H), 8.23 (s, 1H), 7.93 (s, 1H), 7.90-7.85 (m, 4H), 7.79 (d, *J* = 1.9 Hz, 1H), 7.49-7.45 (m, 2H), 7.41 – 7.37 (m, 2H), 7.31 (s, 1H), 7.27 (s, 1H), 2.80 (q, *J* = 7.6 Hz, 2H), 2.70 (q, *J* = 7.5 Hz, 2H), 1.34 (t, *J* = 7.6 Hz, 3H), 1.18 (t, *J* = 7.6 Hz, 3H). <sup>13</sup>C NMR (125 MHz, CDCl<sub>3</sub>): δ(ppm) 165.72, 146.18, 145.85, 144.40, 142.20, 141.26, 141.24, 138.73, 134.51, 131.93, 131.52, 131.27, 129.96, 129.56, 129.49, 129.30, 128.73, 127.73, 126.91, 126.71, 126.29, 125.59, 124.93, 1243.35, 122.77, 120.93, 117.08, 116.37, 28.83, 26.33, 15.46, 15.40. HRMS (ESI) calcd for C<sub>30</sub>H<sub>25</sub>F<sub>3</sub>N<sub>4</sub>O [M+H]<sup>+</sup> : 515.2053; found 515.2058. HPLC purity= 97.85%, Rt 11.10 min.

**Table S1 The results of the selectivity profiling study of compound 8v**

| Gene Symbol                   | %Ctrl @ 200nM |
|-------------------------------|---------------|
| AAK1                          | 100           |
| ABL1(E255K)-phosphorylated    | 98            |
| ABL1(F317I)-nonphosphorylated | 72            |
| ABL1(F317I)-phosphorylated    | 100           |
| ABL1(F317L)-nonphosphorylated | 73            |
| ABL1(F317L)-phosphorylated    | 56            |
| ABL1(H396P)-nonphosphorylated | 95            |
| ABL1(H396P)-phosphorylated    | 84            |
| ABL1(M351T)-phosphorylated    | 74            |
| ABL1(Q252H)-nonphosphorylated | 85            |
| ABL1(Q252H)-phosphorylated    | 79            |
| ABL1(T315I)-nonphosphorylated | 87            |
| ABL1(T315I)-phosphorylated    | 62            |
| ABL1(Y253F)-phosphorylated    | 79            |
| ABL1-nonphosphorylated        | 94            |
| ABL1-phosphorylated           | 82            |
| ABL2                          | 97            |
| ACVR1                         | 69            |
| ACVR1B                        | 80            |
| ACVR2A                        | 100           |
| ACVR2B                        | 100           |
| ACVRL1                        | 73            |
| ADCK3                         | 65            |
| ADCK4                         | 58            |
| AKT1                          | 69            |
| AKT2                          | 74            |
| AKT3                          | 100           |
| ALK                           | 91            |
| ALK(C1156Y)                   | 89            |
| ALK(L1196M)                   | 97            |
| AMPK-alpha1                   | 95            |
| AMPK-alpha2                   | 89            |
| ANKK1                         | 91            |
| ARK5                          | 89            |
| ASK1                          | 95            |
| ASK2                          | 82            |
| AURKA                         | 79            |
| AURKB                         | 97            |
| AURKC                         | 95            |
| AXL                           | 77            |
| BIKE                          | 100           |
| BLK                           | 91            |
| BMPR1A                        | 78            |
| BMPR1B                        | 80            |
| BMPR2                         | 99            |
| BMX                           | 58            |
| BRAF                          | 77            |
| BRAF(V600E)                   | 60            |

| Gene Symbol         | %Ctrl @ 200nM |
|---------------------|---------------|
| BRK                 | 80            |
| BRSK1               | 75            |
| BRSK2               | 94            |
| BTK                 | 99            |
| BUB1                | 99            |
| CAMK1               | 77            |
| CAMK1B              | 91            |
| CAMK1D              | 0.9           |
| CAMK1G              | 93            |
| CAMK2A              | 90            |
| CAMK2B              | 93            |
| CAMK2D              | 83            |
| CAMK2G              | 97            |
| CAMK4               | 78            |
| CAMKK1              | 95            |
| CAMKK2              | 88            |
| CASK                | 77            |
| CDC2L1              | 94            |
| CDC2L2              | 92            |
| CDC2L5              | 100           |
| CDK11               | 84            |
| CDK2                | 71            |
| CDK3                | 92            |
| CDK4                | 100           |
| CDK4-cyclinD1       | 32            |
| CDK4-cyclinD3       | 48            |
| CDK5                | 74            |
| CDK7                | 72            |
| CDK8                | 82            |
| CDK9                | 93            |
| CDKL1               | 86            |
| CDKL2               | 83            |
| CDKL3               | 90            |
| CDKL5               | 84            |
| CHEK1               | 74            |
| CHEK2               | 100           |
| CIT                 | 93            |
| CLK1                | 71            |
| CLK2                | 92            |
| CLK3                | 73            |
| CLK4                | 1.8           |
| CSF1R               | 90            |
| CSF1R-autoinhibited | 93            |
| CSK                 | 91            |
| CSNK1A1             | 92            |
| CSNK1A1L            | 72            |
| CSNK1D              | 63            |
| CSNK1E              | 70            |
| CSNK1G1             | 97            |

| Gene Symbol               | %Ctrl @ 200nM |
|---------------------------|---------------|
| CSNK1G2                   | 95            |
| CSNK1G3                   | 72            |
| CSNK2A1                   | 68            |
| CSNK2A2                   | 67            |
| CTK                       | 70            |
| DAPK1                     | 100           |
| DAPK2                     | 93            |
| DAPK3                     | 98            |
| DCAMKL1                   | 100           |
| DCAMKL2                   | 86            |
| DCAMKL3                   | 76            |
| DDR1                      | 0             |
| DDR2                      | 15            |
| DLK                       | 100           |
| DMPK                      | 96            |
| DMPK2                     | 75            |
| DRAK1                     | 100           |
| DRAK2                     | 99            |
| DYRK1A                    | 87            |
| DYRK1B                    | 81            |
| DYRK2                     | 73            |
| EGFR                      | 89            |
| EGFR(E746-A750del)        | 75            |
| EGFR(G719C)               | 96            |
| EGFR(G719S)               | 96            |
| EGFR(L747-E749del, A750P) | 82            |
| EGFR(L747-S752del, P753S) | 79            |
| EGFR(L747-T751del,Sins)   | 99            |
| EGFR(L858R)               | 83            |
| EGFR(L858R,T790M)         | 100           |
| EGFR(L861Q)               | 93            |
| EGFR(S752-I759del)        | 92            |
| EGFR(T790M)               | 95            |
| EIF2AK1                   | 90            |
| EPHA1                     | 71            |
| EPHA2                     | 60            |
| EPHA3                     | 80            |
| EPHA4                     | 71            |
| EPHA5                     | 71            |
| EPHA6                     | 67            |
| EPHA7                     | 99            |
| EPHA8                     | 75            |
| EPHB1                     | 100           |
| EPHB2                     | 92            |
| EPHB3                     | 75            |
| EPHB4                     | 65            |
| EPHB6                     | 11            |
| ERBB2                     | 91            |
| ERBB3                     | 99            |

| Gene Symbol           | %Ctrl @ 200nM |
|-----------------------|---------------|
| ERBB4                 | 100           |
| ERK1                  | 97            |
| ERK2                  | 67            |
| ERK3                  | 76            |
| ERK4                  | 78            |
| ERK5                  | 94            |
| ERK8                  | 81            |
| ERN1                  | 75            |
| FAK                   | 79            |
| FER                   | 79            |
| FES                   | 84            |
| FGFR1                 | 93            |
| FGFR2                 | 88            |
| FGFR3                 | 70            |
| FGFR3(G697C)          | 69            |
| FGFR4                 | 82            |
| FGR                   | 72            |
| FLT1                  | 97            |
| FLT3                  | 86            |
| FLT3(D835H)           | 89            |
| FLT3(D835V)           | 92            |
| FLT3(D835Y)           | 97            |
| FLT3(ITD)             | 100           |
| FLT3(ITD,D835V)       | 100           |
| FLT3(ITD,F691L)       | 100           |
| FLT3(K663Q)           | 92            |
| FLT3(N841I)           | 78            |
| FLT3(R834Q)           | 95            |
| FLT3-autoinhibited    | 94            |
| FLT4                  | 92            |
| FRK                   | 69            |
| FYN                   | 76            |
| GAK                   | 95            |
| GCN2(Kin.Dom.2,S808G) | 87            |
| GRK1                  | 94            |
| GRK2                  | 73            |
| GRK3                  | 96            |
| GRK4                  | 72            |
| GRK7                  | 73            |
| GSK3A                 | 96            |
| GSK3B                 | 89            |
| HASPIN                | 86            |
| HCK                   | 99            |
| HIPK1                 | 96            |
| HIPK2                 | 100           |
| HIPK3                 | 100           |
| HIPK4                 | 74            |
| HPK1                  | 97            |
| HUNK                  | 98            |

| Gene Symbol                  | %Ctrl @ 200nM |
|------------------------------|---------------|
| ICK                          | 98            |
| IGF1R                        | 93            |
| IKK-alpha                    | 100           |
| IKK-beta                     | 98            |
| IKK-epsilon                  | 100           |
| INSR                         | 90            |
| INSRR                        | 87            |
| IRAK1                        | 100           |
| IRAK3                        | 95            |
| IRAK4                        | 97            |
| ITK                          | 100           |
| JAK1(JH1domain-catalytic)    | 87            |
| JAK1(JH2domain-pseudokinase) | 100           |
| JAK2(JH1domain-catalytic)    | 100           |
| JAK3(JH1domain-catalytic)    | 100           |
| JNK1                         | 97            |
| JNK2                         | 79            |
| JNK3                         | 96            |
| KIT                          | 41            |
| KIT(A829P)                   | 100           |
| KIT(D816H)                   | 100           |
| KIT(D816V)                   | 73            |
| KIT(L576P)                   | 57            |
| KIT(V559D)                   | 39            |
| KIT(V559D,T670I)             | 93            |
| KIT(V559D,V654A)             | 100           |
| KIT-autoinhibited            | 97            |
| LATS1                        | 98            |
| LATS2                        | 100           |
| LCK                          | 95            |
| LIMK1                        | 64            |
| LIMK2                        | 76            |
| LKB1                         | 80            |
| LOK                          | 58            |
| LRRK2                        | 100           |
| LRRK2(G2019S)                | 100           |
| LTK                          | 93            |
| LYN                          | 95            |
| LZK                          | 84            |
| MAK                          | 100           |
| MAP3K1                       | 100           |
| MAP3K15                      | 76            |
| MAP3K2                       | 100           |
| MAP3K3                       | 99            |
| MAP3K4                       | 83            |
| MAP4K2                       | 99            |
| MAP4K3                       | 82            |
| MAP4K4                       | 100           |
| MAP4K5                       | 100           |

| Gene Symbol | %Ctrl @ 200nM |
|-------------|---------------|
| MAPKAPK2    | 70            |
| MAPKAPK5    | 70            |
| MARK1       | 99            |
| MARK2       | 95            |
| MARK3       | 62            |
| MARK4       | 97            |
| MAST1       | 98            |
| MEK1        | 90            |
| MEK2        | 99            |
| MEK3        | 96            |
| MEK4        | 96            |
| MEK5        | 100           |
| MEK6        | 85            |
| MELK        | 87            |
| MERTK       | 78            |
| MET         | 100           |
| MET(M1250T) | 73            |
| MET(Y1235D) | 74            |
| MINK        | 95            |
| MKK7        | 100           |
| MKKNK1      | 100           |
| MKKNK2      | 96            |
| MLCK        | 98            |
| MLK1        | 100           |
| MLK2        | 74            |
| MLK3        | 84            |
| MRCKA       | 76            |
| MRCKB       | 82            |
| MST1        | 89            |
| MST1R       | 69            |
| MST2        | 95            |
| MST3        | 93            |
| MST4        | 84            |
| MTOR        | 100           |
| MUSK        | 83            |
| MYLK        | 92            |
| MYLK2       | 96            |
| MYLK4       | 94            |
| MYO3A       | 87            |
| MYO3B       | 90            |
| NDR1        | 90            |
| NDR2        | 96            |
| NEK1        | 92            |
| NEK10       | 98            |
| NEK11       | 100           |
| NEK2        | 94            |
| NEK3        | 98            |
| NEK4        | 76            |
| NEK5        | 93            |

| Gene Symbol           | %Ctrl @ 200nM |
|-----------------------|---------------|
| NEK6                  | 78            |
| NEK7                  | 79            |
| NEK9                  | 77            |
| NIK                   | 74            |
| NIM1                  | 96            |
| NLK                   | 49            |
| OSR1                  | 92            |
| p38-alpha             | 87            |
| p38-beta              | 91            |
| p38-delta             | 56            |
| p38-gamma             | 100           |
| PAK1                  | 86            |
| PAK2                  | 82            |
| PAK3                  | 70            |
| PAK4                  | 100           |
| PAK6                  | 87            |
| PAK7                  | 89            |
| PCTK1                 | 94            |
| PCTK2                 | 71            |
| PCTK3                 | 94            |
| PDGFRA                | 98            |
| PDGFRB                | 69            |
| PDPK1                 | 97            |
| PFCDPK1(P.falciparum) | 76            |
| PFPK5(P.falciparum)   | 65            |
| PFTAIRES2             | 68            |
| PFTK1                 | 89            |
| PHKG1                 | 56            |
| PHKG2                 | 97            |
| PIK3C2B               | 100           |
| PIK3C2G               | 85            |
| PIK3CA                | 100           |
| PIK3CA(C420R)         | 97            |
| PIK3CA(E542K)         | 84            |
| PIK3CA(E545A)         | 97            |
| PIK3CA(E545K)         | 88            |
| PIK3CA(H1047L)        | 85            |
| PIK3CA(H1047Y)        | 94            |
| PIK3CA(I800L)         | 78            |
| PIK3CA(M1043I)        | 94            |
| PIK3CA(Q546K)         | 89            |
| PIK3CB                | 100           |
| PIK3CD                | 81            |
| PIK3CG                | 100           |
| PIK4CB                | 100           |
| PIKFYVE               | 100           |
| PIM1                  | 94            |
| PIM2                  | 74            |
| PIM3                  | 87            |

| Gene Symbol                   | %Ctrl @ 200nM |
|-------------------------------|---------------|
| PIP5K1A                       | 89            |
| PIP5K1C                       | 86            |
| PIP5K2B                       | 98            |
| PIP5K2C                       | 99            |
| PKAC-alpha                    | 88            |
| PKAC-beta                     | 90            |
| PKMYT1                        | 76            |
| PKN1                          | 100           |
| PKN2                          | 91            |
| PKNB(M.tuberculosis)          | 91            |
| PLK1                          | 97            |
| PLK2                          | 93            |
| PLK3                          | 100           |
| PLK4                          | 89            |
| PRKCD                         | 94            |
| PRKCE                         | 100           |
| PRKCH                         | 55            |
| PRKCI                         | 54            |
| PRKCQ                         | 75            |
| PRKD1                         | 74            |
| PRKD2                         | 96            |
| PRKD3                         | 96            |
| PRKG1                         | 98            |
| PRKG2                         | 87            |
| PRKR                          | 89            |
| PRKX                          | 44            |
| PRP4                          | 75            |
| PYK2                          | 57            |
| QSK                           | 81            |
| RAF1                          | 53            |
| RET                           | 83            |
| RET(M918T)                    | 81            |
| RET(V804L)                    | 95            |
| RET(V804M)                    | 96            |
| RIOK1                         | 100           |
| RIOK2                         | 64            |
| RIOK3                         | 99            |
| RIPK1                         | 97            |
| RIPK2                         | 79            |
| RIPK4                         | 99            |
| RIPK5                         | 89            |
| ROCK1                         | 95            |
| ROCK2                         | 91            |
| ROS1                          | 75            |
| RPS6KA4(Kin.Dom.1-N-terminal) | 84            |
| RPS6KA4(Kin.Dom.2-C-terminal) | 72            |
| RPS6KA5(Kin.Dom.1-N-terminal) | 71            |
| RPS6KA5(Kin.Dom.2-C-terminal) | 93            |
| RSK1(Kin.Dom.1-N-terminal)    | 100           |

| Gene Symbol                | %Ctrl @ 200nM |
|----------------------------|---------------|
| RSK1(Kin.Dom.2-C-terminal) | 92            |
| RSK2(Kin.Dom.1-N-terminal) | 100           |
| RSK2(Kin.Dom.2-C-terminal) | 89            |
| RSK3(Kin.Dom.1-N-terminal) | 72            |
| RSK3(Kin.Dom.2-C-terminal) | 80            |
| RSK4(Kin.Dom.1-N-terminal) | 100           |
| RSK4(Kin.Dom.2-C-terminal) | 100           |
| S6K1                       | 99            |
| SBK1                       | 100           |
| SGK                        | 80            |
| SgK110                     | 82            |
| SGK2                       | 99            |
| SGK3                       | 87            |
| SIK                        | 85            |
| SIK2                       | 82            |
| SLK                        | 99            |
| SNARK                      | 93            |
| SNRK                       | 84            |
| SRC                        | 90            |
| SRMS                       | 100           |
| SRPK1                      | 91            |
| SRPK2                      | 96            |
| SRPK3                      | 73            |
| STK16                      | 100           |
| STK33                      | 92            |
| STK35                      | 81            |
| STK36                      | 96            |
| STK39                      | 97            |
| SYK                        | 93            |
| TAK1                       | 98            |
| TAOK1                      | 100           |
| TAOK2                      | 100           |
| TAOK3                      | 100           |
| TBK1                       | 91            |
| TEC                        | 100           |
| TESK1                      | 77            |
| TGFBR1                     | 71            |
| TGFBR2                     | 78            |
| TIE1                       | 76            |
| TIE2                       | 83            |
| TLK1                       | 93            |
| TLK2                       | 88            |
| TNIK                       | 93            |
| TNK1                       | 70            |
| TNK2                       | 81            |
| TNNI3K                     | 51            |
| TRKA                       | 94            |
| TRKB                       | 100           |
| TRKC                       | 90            |

| Target                       | D2454         |
|------------------------------|---------------|
| Gene Symbol                  | %Ctrl @ 200nM |
| TRPM6                        | 88            |
| TSSK1B                       | 67            |
| TSSK3                        | 97            |
| TTK                          | 0             |
| TXK                          | 91            |
| TYK2(JH1domain-catalytic)    | 100           |
| TYK2(JH2domain-pseudokinase) | 97            |
| TYRO3                        | 84            |
| ULK1                         | 95            |
| ULK2                         | 98            |
| ULK3                         | 98            |
| VEGFR2                       | 91            |
| VPS34                        | 78            |
| VRK2                         | 94            |
| WEE1                         | 100           |
| WEE2                         | 69            |
| WNK1                         | 99            |
| WNK2                         | 97            |
| WNK3                         | 98            |
| WNK4                         | 87            |
| YANK1                        | 73            |
| YANK2                        | 90            |
| YANK3                        | 65            |
| YES                          | 86            |
| YSK1                         | 81            |
| YSK4                         | 79            |
| ZAK                          | 70            |
| ZAP70                        | 84            |

**Table S2.** S-score table for **8v**

| Compd     | Selectivity Score Type | Number of hits | Number of Non-Mutant Kinases | Screening Concentration (nM) | Selectivity Score |
|-----------|------------------------|----------------|------------------------------|------------------------------|-------------------|
| <b>8v</b> | S(35)                  | 7              | 403                          | 200                          | 0.017             |
|           | S(10)                  | 4              | 403                          | 200                          | 0.01              |
|           | S(1)                   | 3              | 403                          | 200                          | 0.007             |

**Active-site dependent competition binding assay–Kinome<sup>scan</sup> Screening**

The binding affinity of **8v** with DDR1 was analyzed by KINOME scan system conducted by Ambit Bioscience (San Diego, USA). Briefly, kinases were tagged with DNA. The ligands were biotinylated and immobilized to streptavidin-coated beads. The binding reactions were assembled by incubating DNA-tagged kinases, immobilized ligands, and test compounds in binding reactions (20% SeaBlock, 0.17 × PBS, 0.05% tween-20, 6 mM DTT) for 1.0 h at room temperature. The affinity beads were washed with washing buffer (1× PBS, 0.05% Tween-20) first and then elution buffer (1× PBS, 0.05% Tween 20, 0.5 μM nonbiotinylated affinity ligands). The kinase concentration in the eluate was determined by quantitative PCR of the DNA tagged to the kinase. The ability of the test compound to bind to the kinase was evaluated with percent control (%) as (test compound signal – positive control signal)/negative control signal – positive control signal) × 100%. Negative control is DMSO control (100% ctrl) and positive control is control compound (0% ctrl).

***In vitro* kinase assay**

The functional assays of compounds on the kinase activities of c-Kit and Abl were determined using the FRET-based Z'-Lyte assay system according to the manufacturer's instructions (Invitrogen, USA). Tyrosine 2 peptide was used as Abl substrate, and Ser/Thr 6 peptide was used as the substrate for c-Kit. The reactions were carried out in 384-well plates in a 10 μL of reaction volume with appropriate amount of kinases in 50 mM HEPES (pH 7.5), 10 mM MgCl<sub>2</sub>, 1 mM EGTA, and

0.01% Brij-35. The reactions were incubated 1 h at room temperature in the presence of 2  $\mu$ M of substrate with 10 mM of ATP (for Abl1 assays) or 300  $\mu$ M of ATP (kit assay) and in the presence of various concentrations of the compounds. The development reagent was then added for a further 2 h room temperature incubation followed by the addition of stop solution. Fluorescence signal ratio of 445 nm (Coumarin)/520 nm (fluorescein) was examined on a EnVision Multilabel Reader (Perkin-Elmer, Inc.).

The effects of compounds on the kinases DDR1 and DDR2 were assessed by using a LanthaScreen Eu kinase activity assay technology (Invitrogen, USA). Kinase reactions were performed in a 10  $\mu$ L solution in low-volume 384-well plates. The kinase reaction buffer consisted of 50 mM HEPES pH 7.5, 0.01% BRIJ-35, 10 mM MgCl<sub>2</sub>, and 1 mM EGTA; the concentration of Fluorescein-Poly GAT substrate (Invitrogen, USA) in the assay was 100 nM. Kinase reactions were initiated by the addition of 100 nM ATP in the presence of serially diluted compounds. The reactions were allowed to proceed for 1 h at room temperature before a 10  $\mu$ L preparation of EDTA (20 mM) and Eu-labeled antibody (4 nM) in TR-FRET dilution buffer were added. The final concentration of antibody in the assay well was 2 nM, and the final concentration of EDTA was 10 mM. The plate was allowed to incubate at room temperature for one more hour before the TR-FRET emission ratios of 665 nm/340 nm were acquired on a PerkinElmer EnVision multilabel reader (Perkin-Elmer, Inc.). Data analysis and curve fitting were performed using GraphPad Prism4 software.

#### **Colony formation assay**

Cells were cultured in 6-well plates (1000 cell /well) for overnight and medium were replaced with the new one containing 8v of designated concentrations, and the plates were incubated at 37°C with 5% CO<sub>2</sub> for another 10 days. On the last day, the medium was removed. After being washed with 1X PBS and fixed with methanol, the colonies were stained with 0.25% crystal violet solution for 1 hr. at room temperature. The images were acquired with a scanner and colony numbers were counted after washing and air-drying.

#### **Inhibition on H1299 cell proliferation by CCK-8 assay**

H1299 Tumor cells were plated into 96-well plates (1500~3000/well) in complete medium. After incubation overnight, cells were exposed to various concentrations (0.0032~50 $\mu$ M) of 8v for further 72 hrs. Cell proliferation was evaluated by Cell Counting Kit 8(CCK-8, CK04, Dojindo laboratories, Japan). IC<sub>50</sub> values were calculated by concentration-response curve fitting using GraphPad Prism 5.0 software. Each IC<sub>50</sub> value was expressed as mean  $\pm$  SD.

#### **Wound healing assay**

Cells were seeded in a 6-well plate and allowed to grow to nearly 100% confluence in culture medium. Subsequently, a cell-free line was manually created by scratching the confluent cell monolayers with a 200- $\mu$ l pipette tip. The wounded cell monolayers were washed three times with PBS and incubated in RPMI-1640 with 10% FBS with different concentration of 8v for 24 h. Three scratched fields were randomly chosen and the images were captured by bright-field microscope (CKX41; Olympus). The percentage of wound closure was measured using Adobe Photoshop 7.0.1 (Adobe Systems Inc., San Jose, CA). The experiment was performed three times and in triplicate.

#### **Transwell assay**

Cell migration assays were evaluated in Transwell chambers (353097, 353504; Corning Costar). Cell invasion assays were evaluated in Magrigel invasion chambers (354480; Corning Costar). 0.2~1  $\times 10^5$  tumor cells were plated in the top chamber with medium without FBS. Culture medium containing 8v (0.625~5 $\mu$ mol/L) was added to the bottom chamber. After incubation for 24 hrs at 37°C, the cells were fixed in 100% methanol and stained with 0.25% crystal violet, then cotton swabs were used to remove the cells that had not migrated from the top surface of the filters. Migration cells were quantitated by counting cells in six randomly selected fields on each filter under a microscope at 200 magnification and graphed as the mean of three independent experiments.

#### **Computational study**

All the procedure was performed in Maestro 9.9 (Schrodinger LLC). The crystal structures of DDR1 protein with their corresponding inhibitors were taken from the

PDB (4BKJ). The protein was processed using the “Protein Preparation Wizard” workflow in Maestro 9.9 (Schrodinger LLC) to add bond orders and to add hydrogens. All heteroatom residues and crystal water molecules beyond 5 Å from het group were removed. Inhibitors 8a and 8c were built in the LigPrep module using the OPLS-2005 force field. Glide module was used as the docking program. The grid-enclosing box was placed on the centroid of the binding ligand in the optimized crystal structure as described above, and a scaling factor of 1.0 was set to van der Waals (VDW) radius of those receptor atoms with partial atomic charges of less than 0.25. Standard precision (SP) approach of Glide was adopted to dock 8a and 8c into DDR1 with the default parameters, and the top-ranking pose was selected for energy minimization using Prime MM-GBSA, under the solvation model of VSGB.

# The $^1\text{H}$ and $^{13}\text{C}$ NMR spectra of compounds 8a-8w

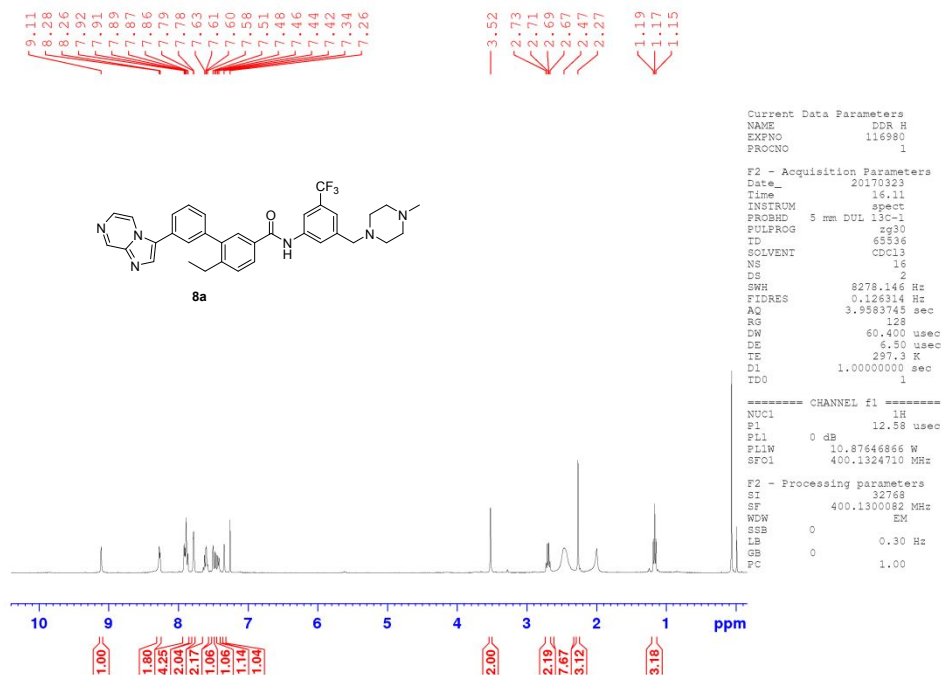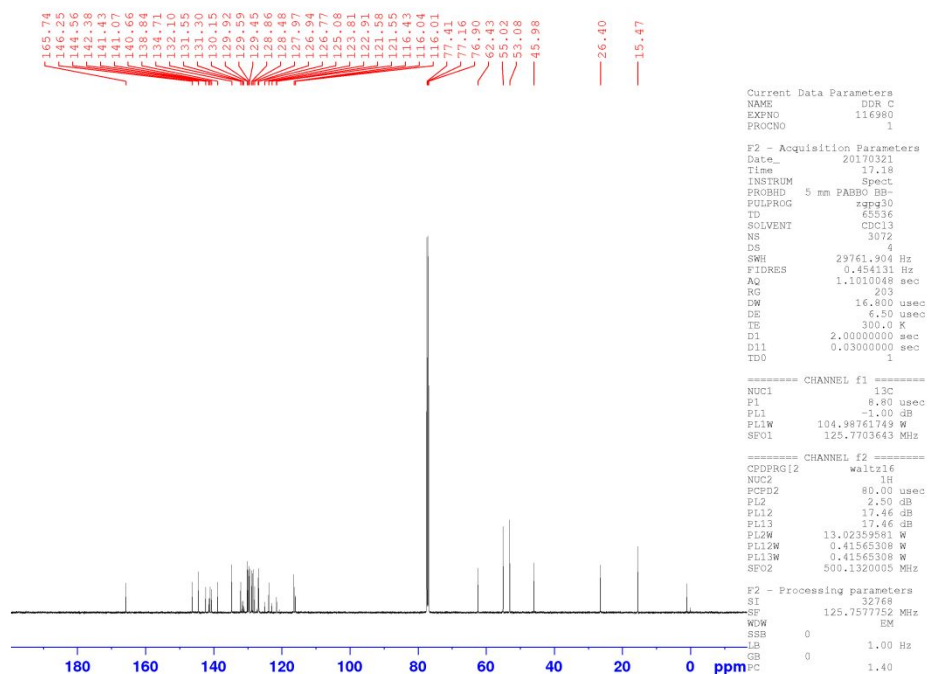

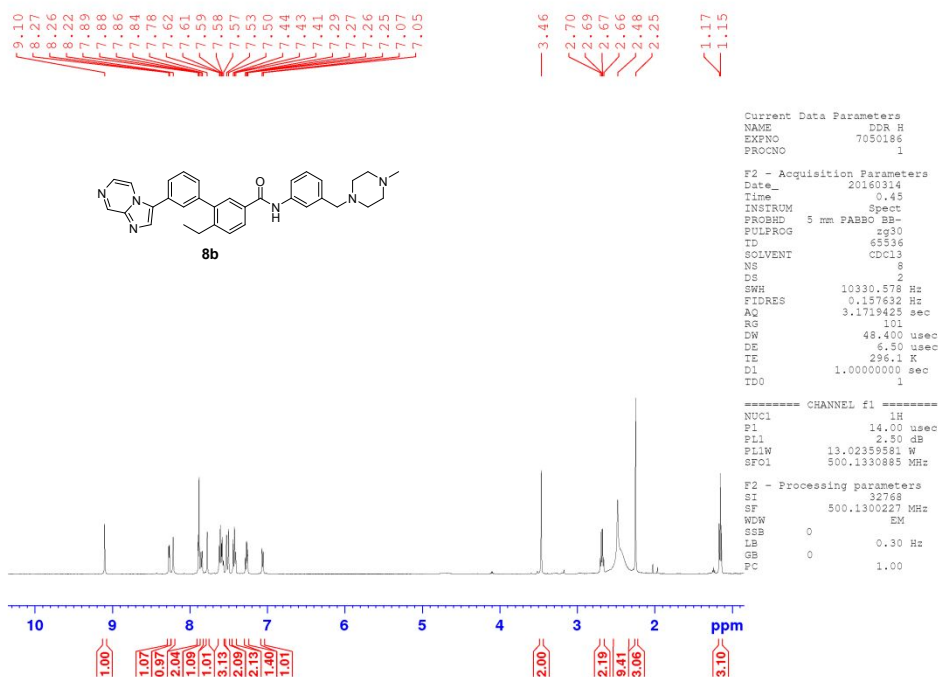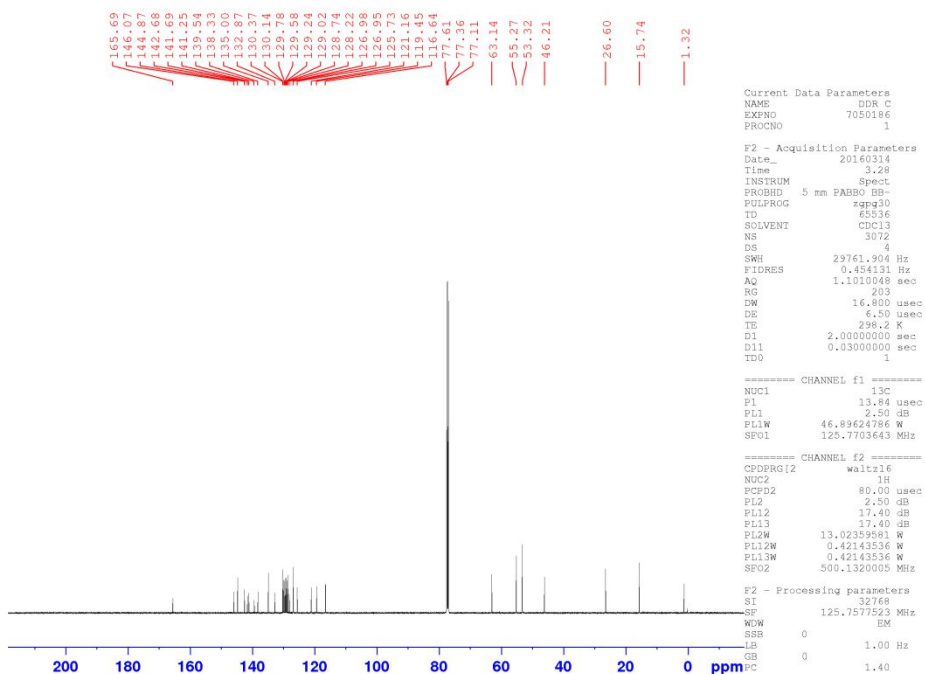

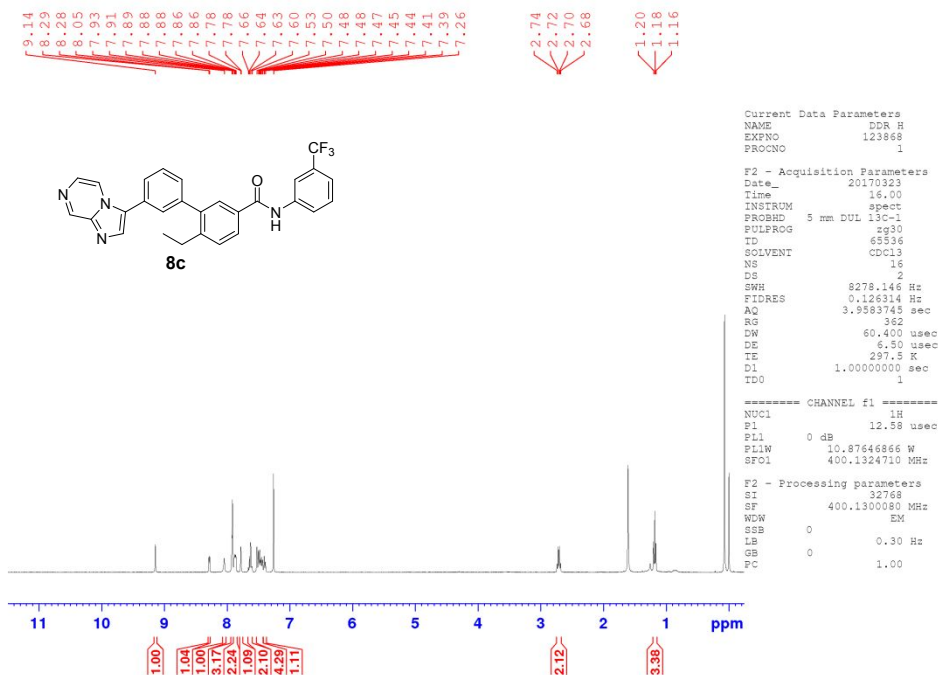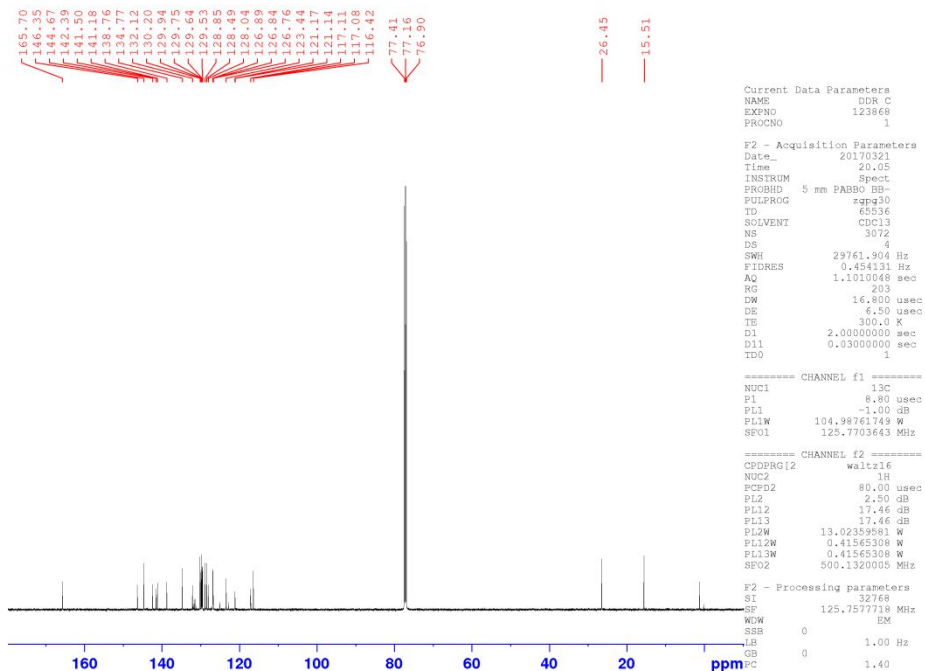

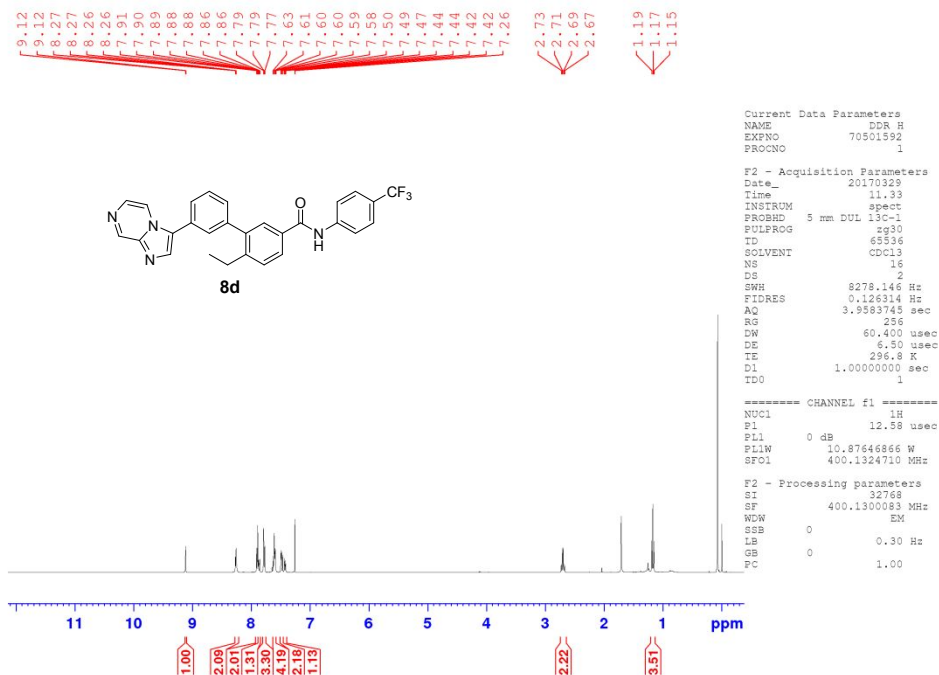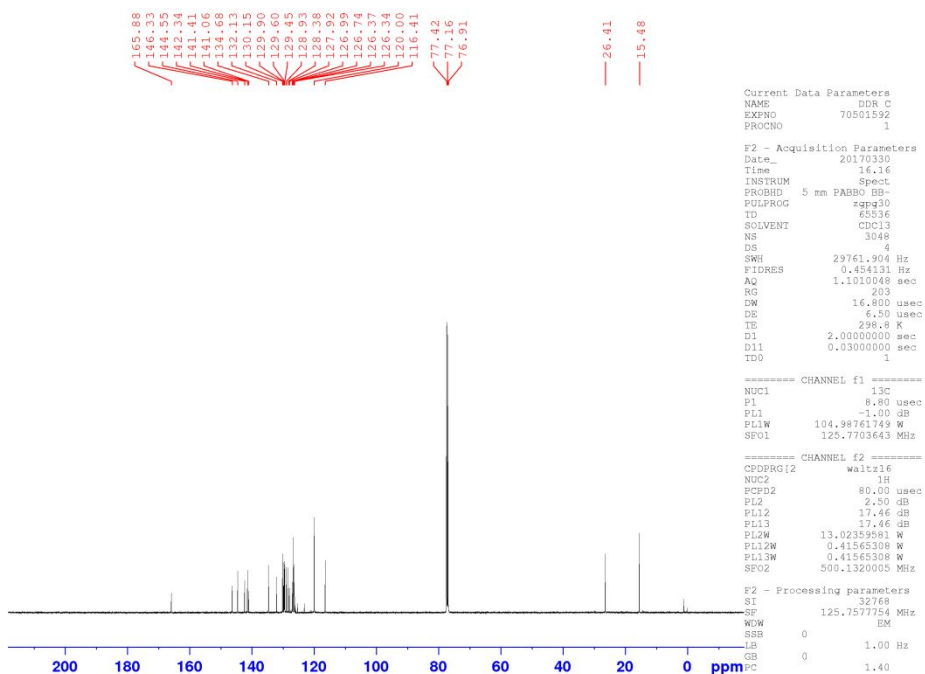

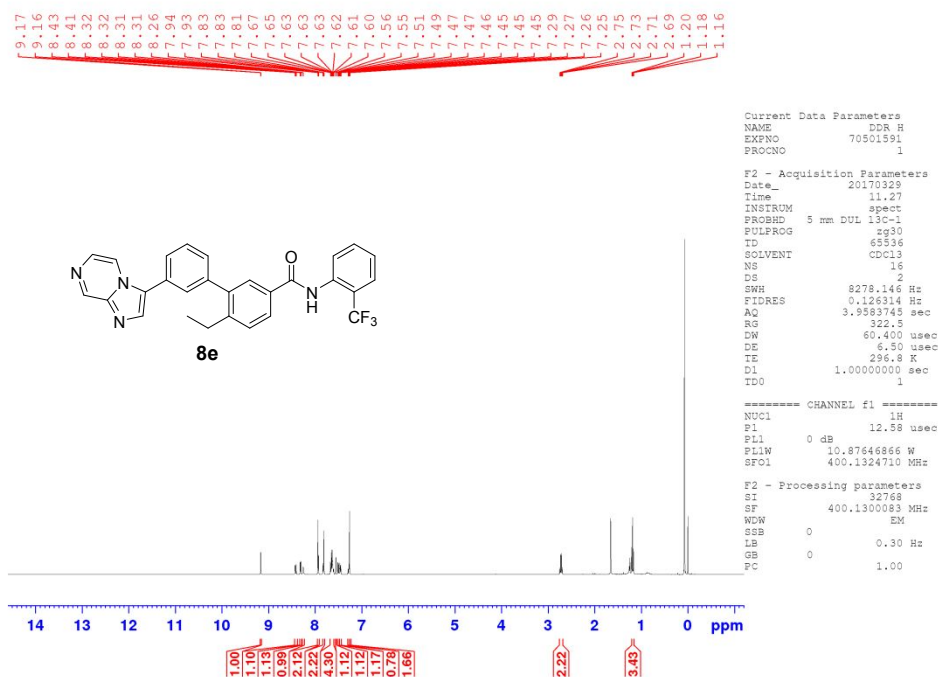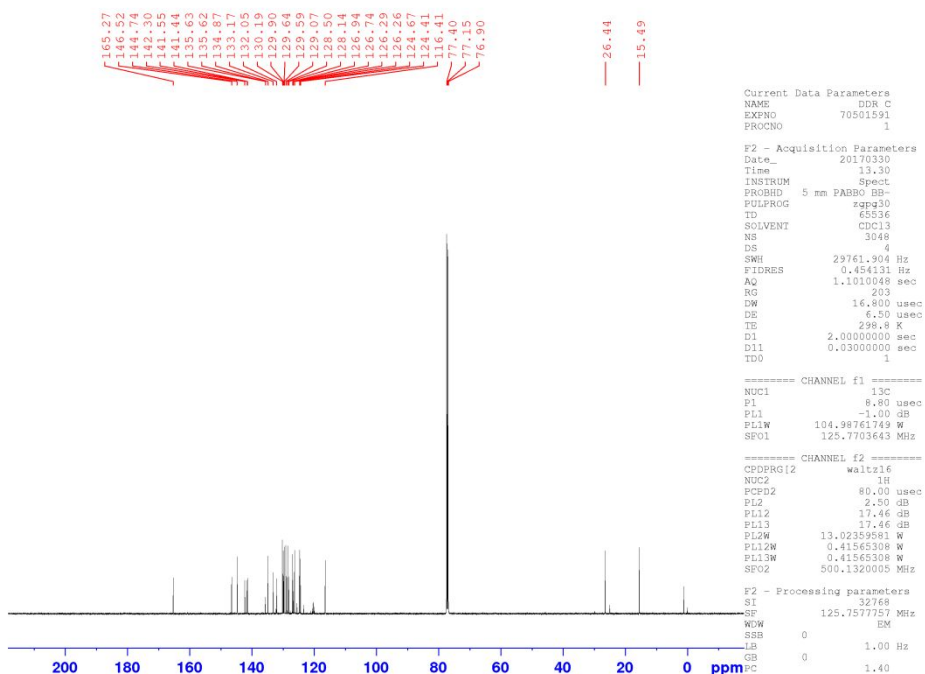

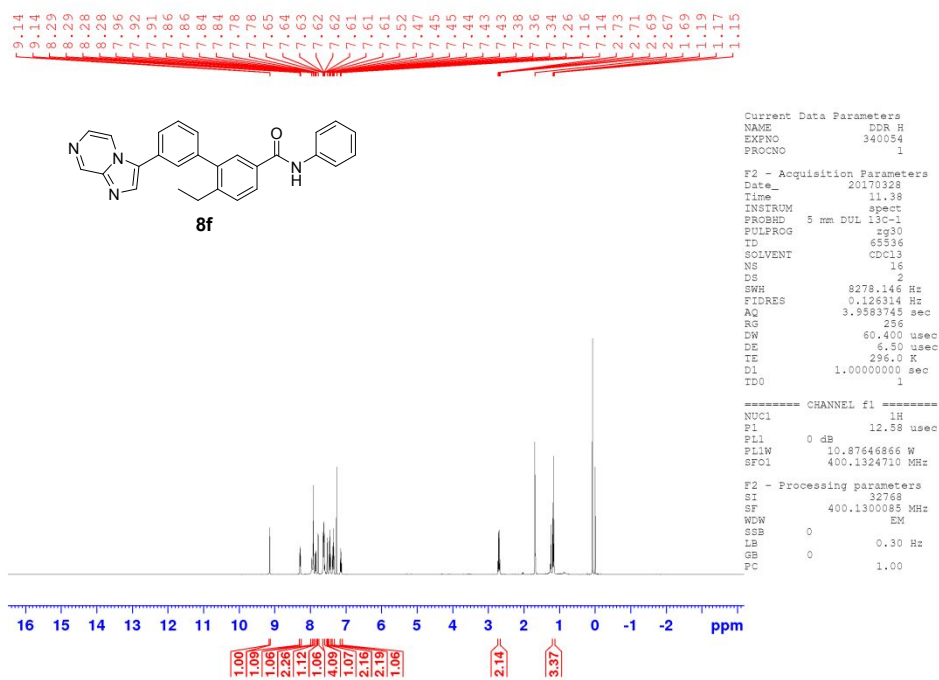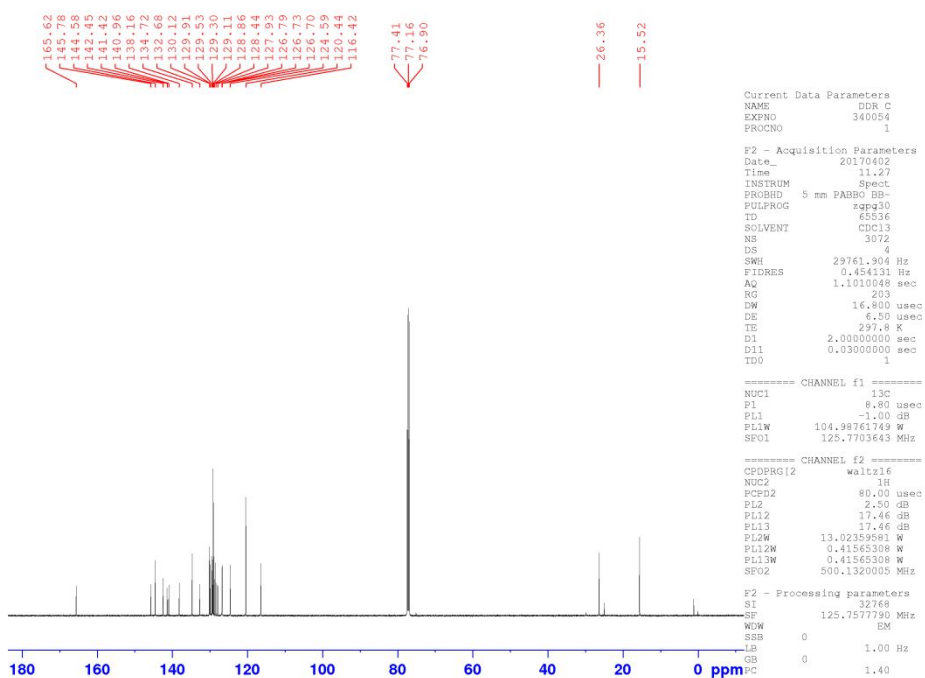

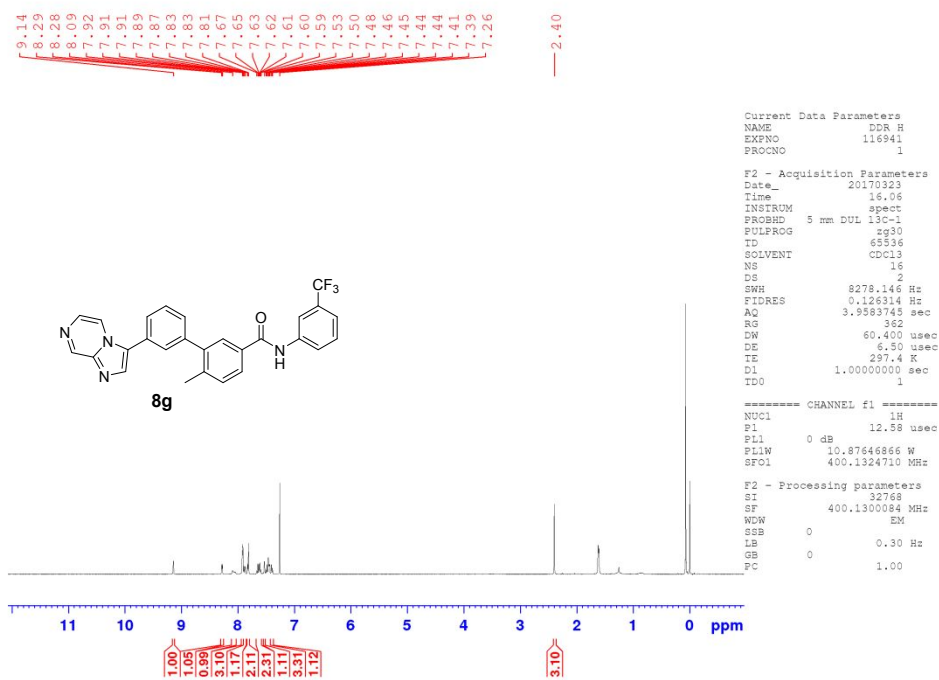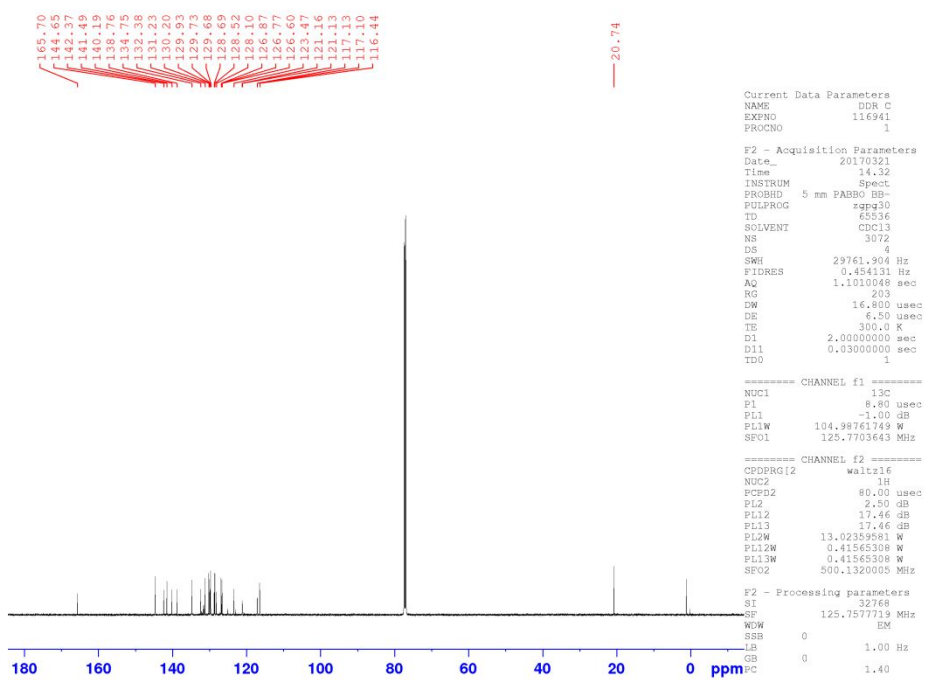

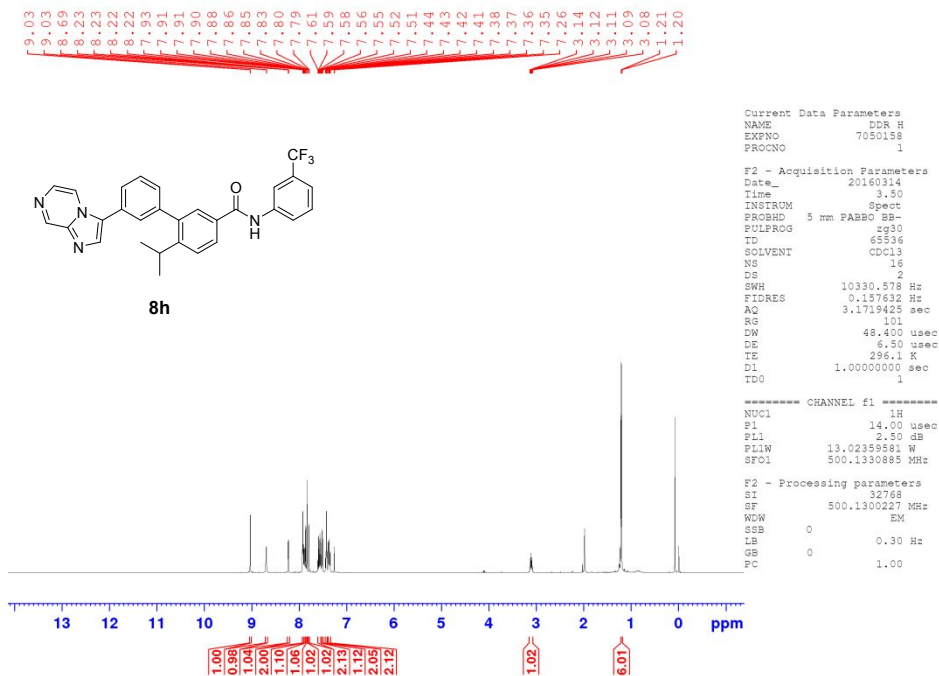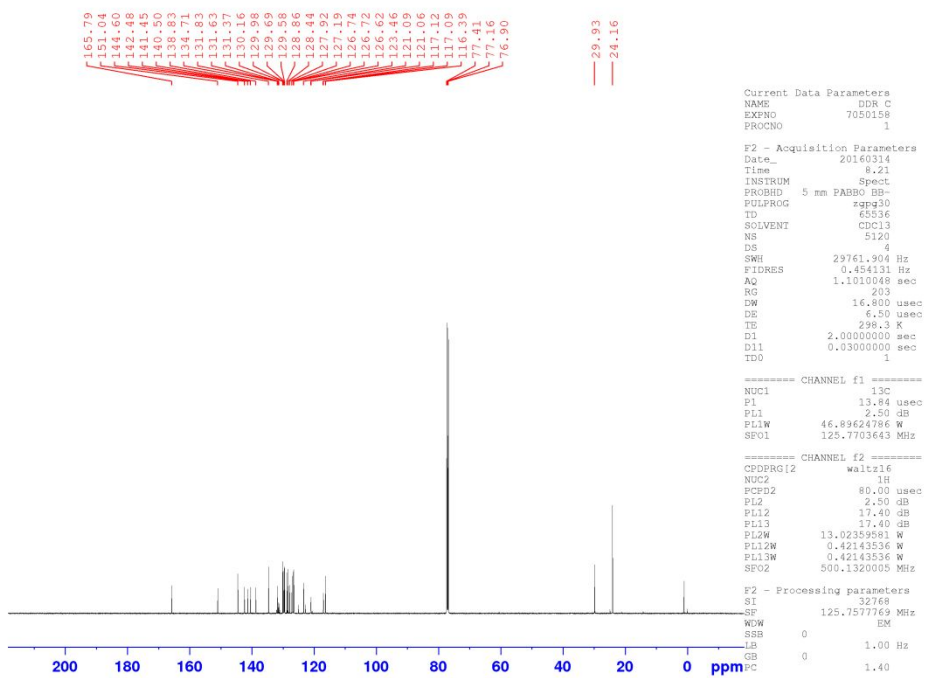

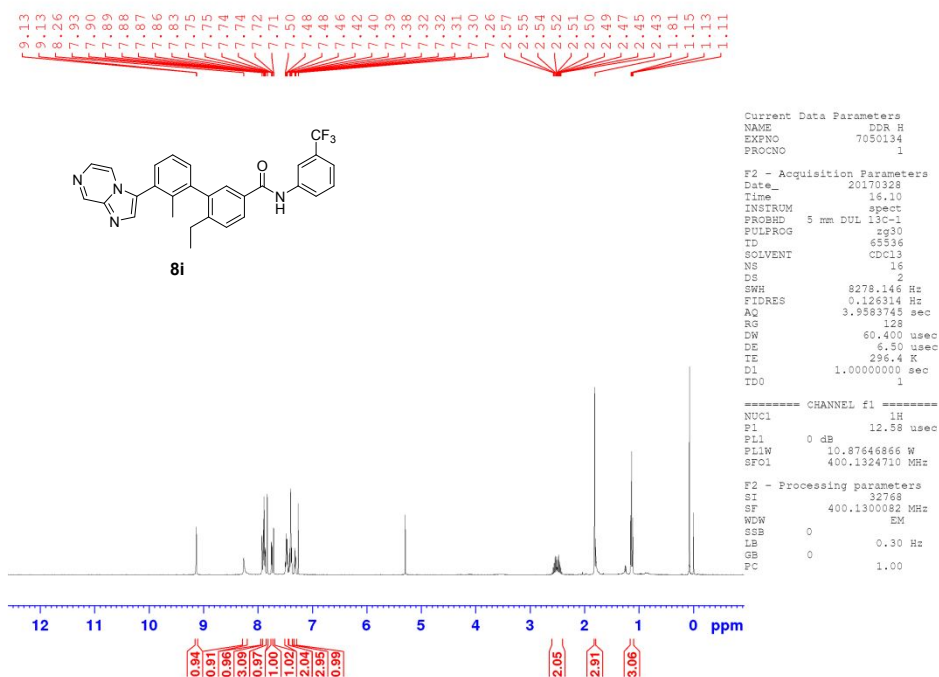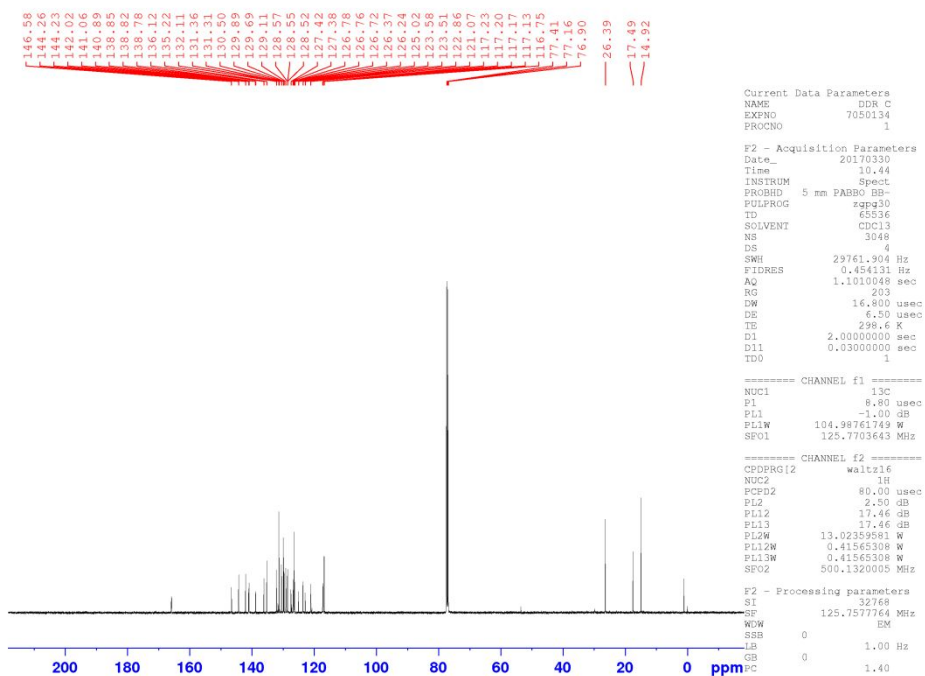

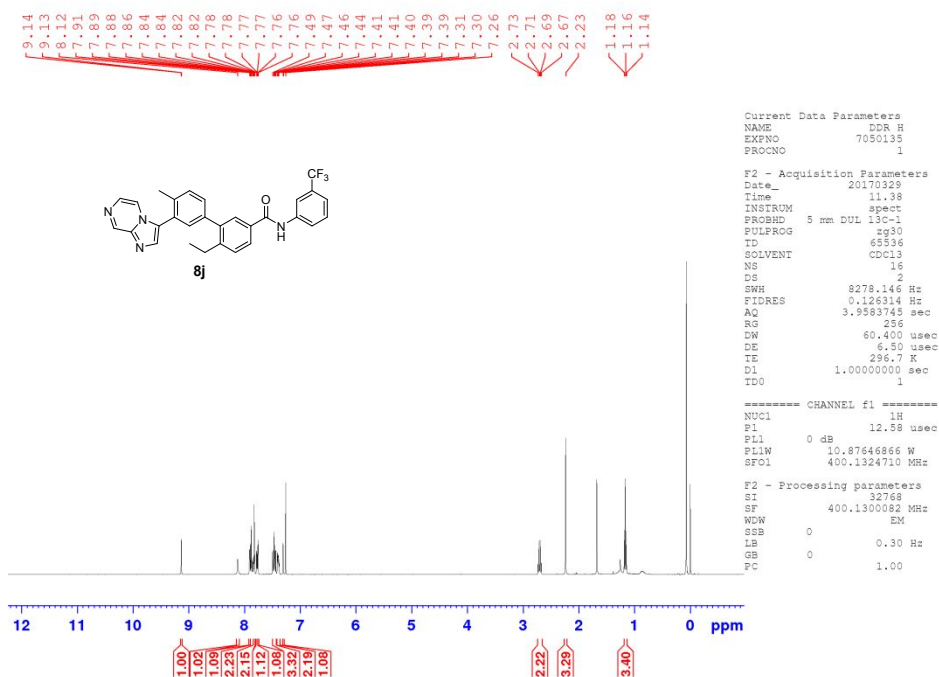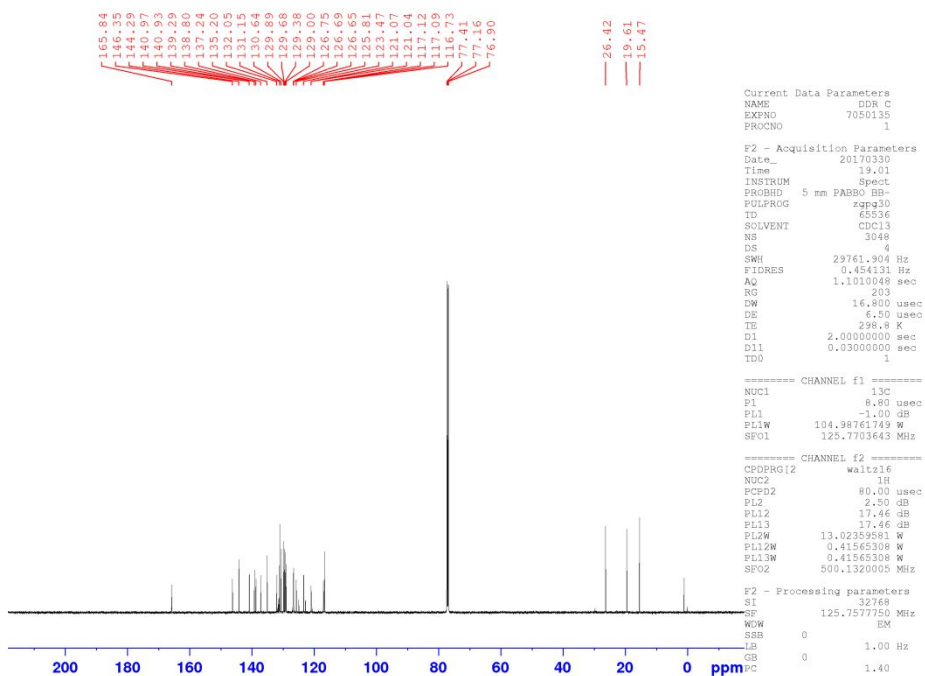

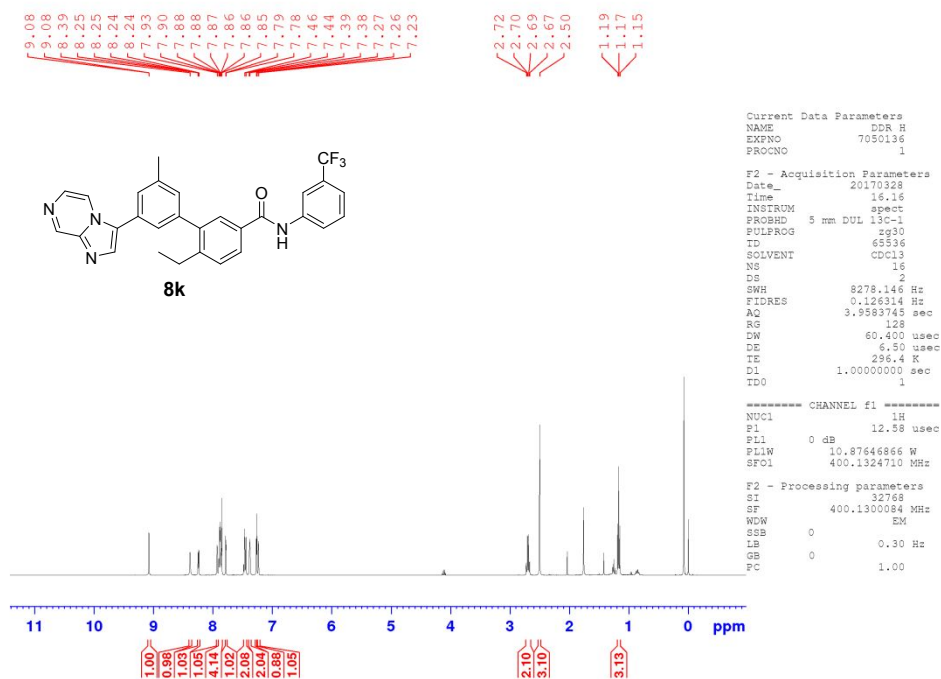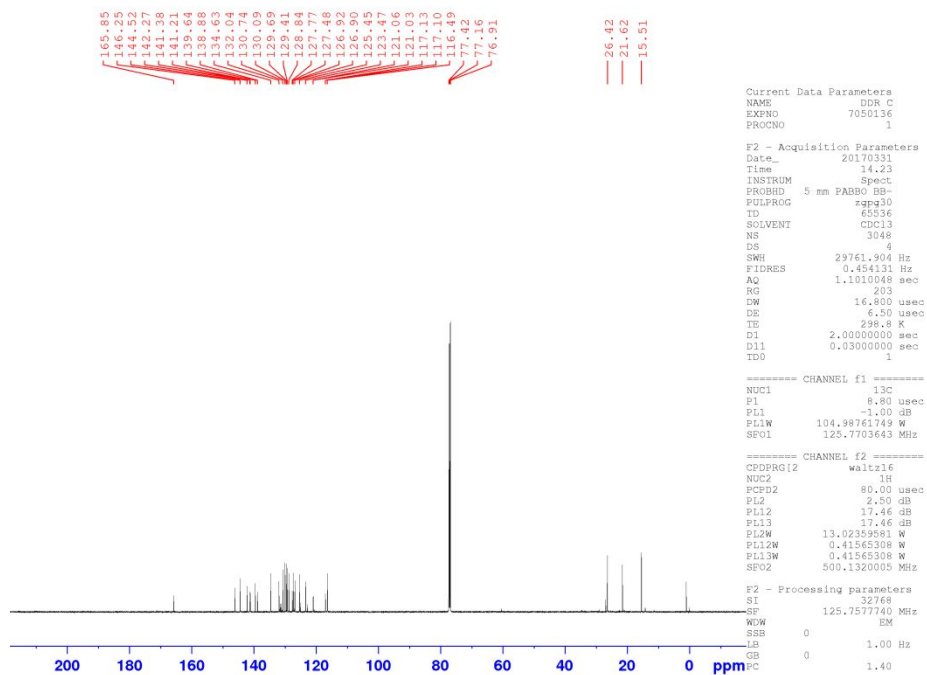

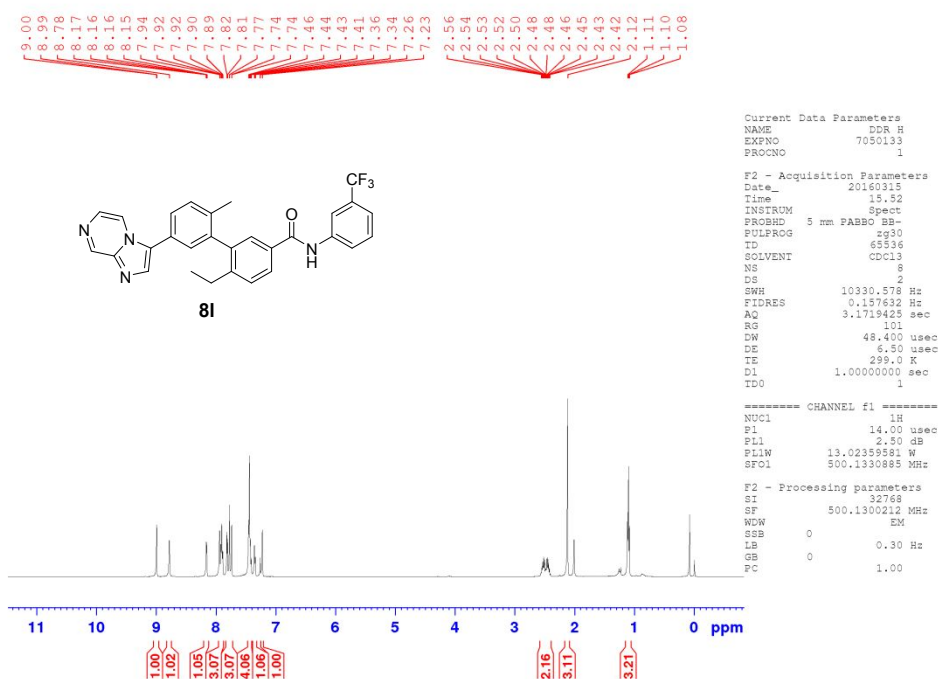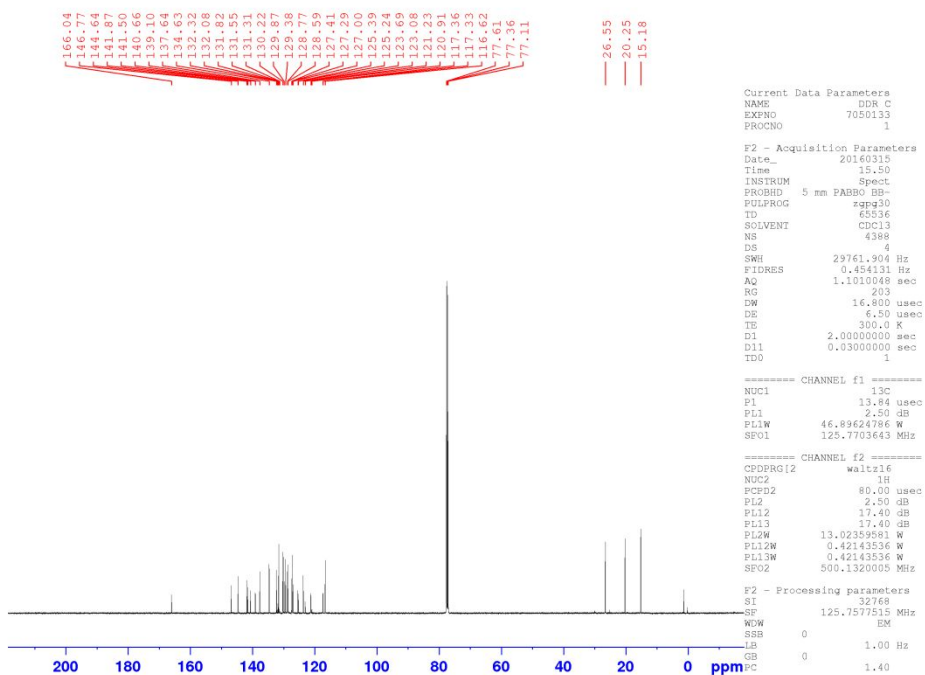

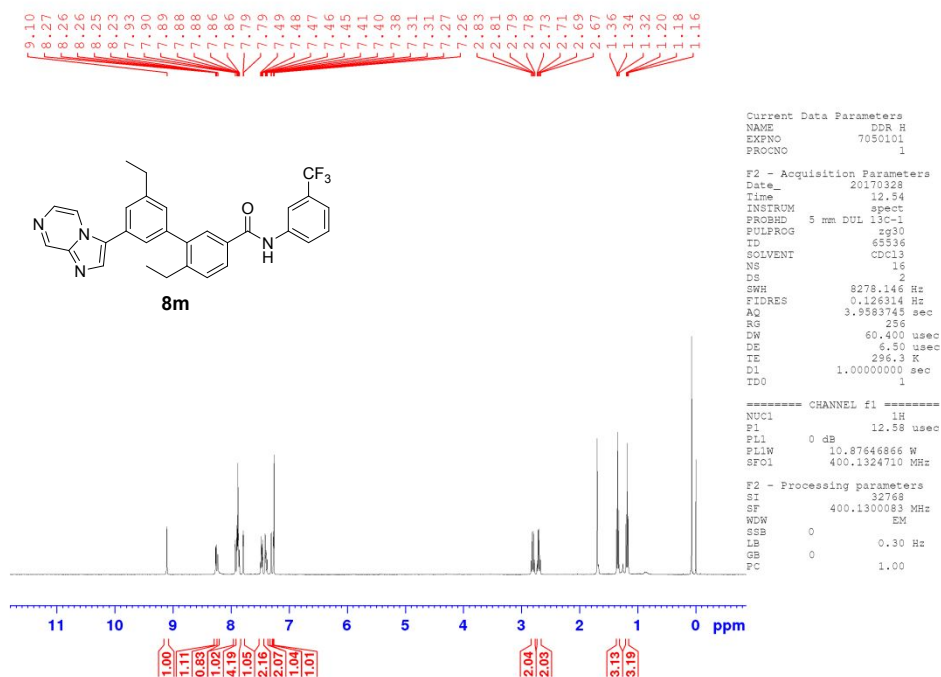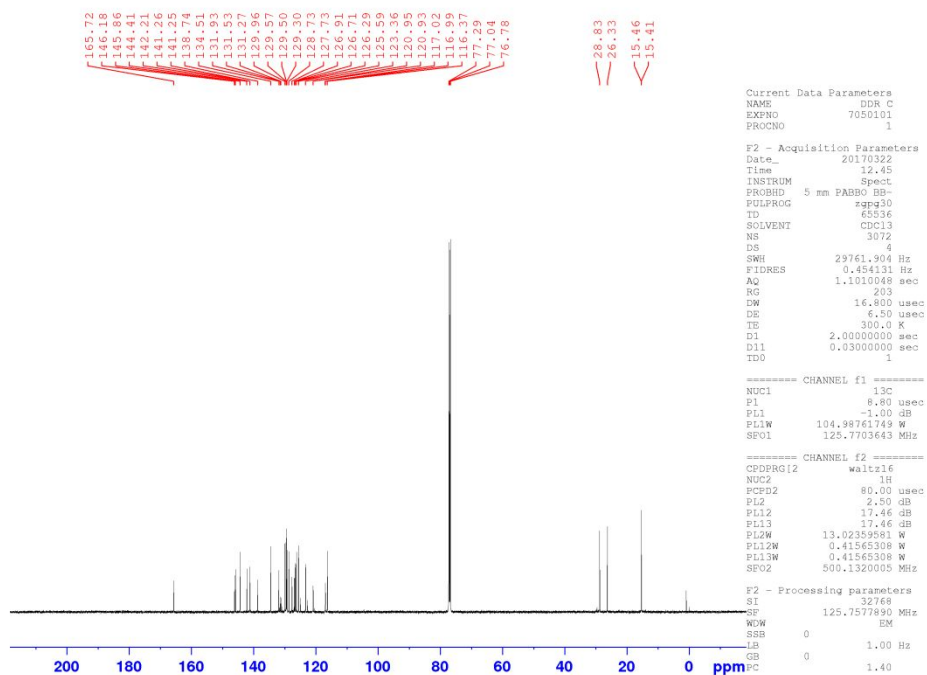

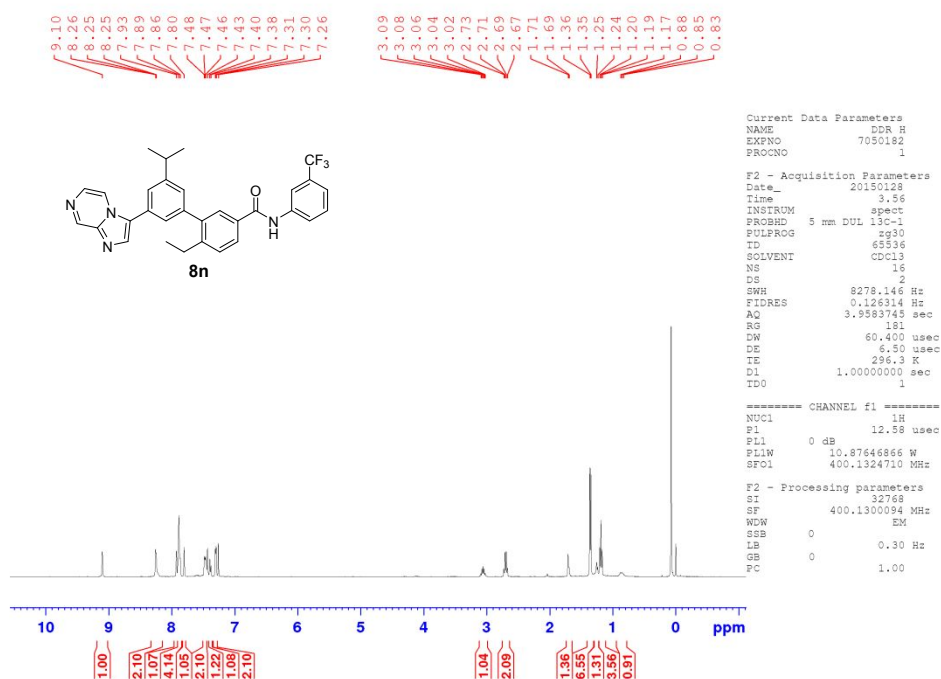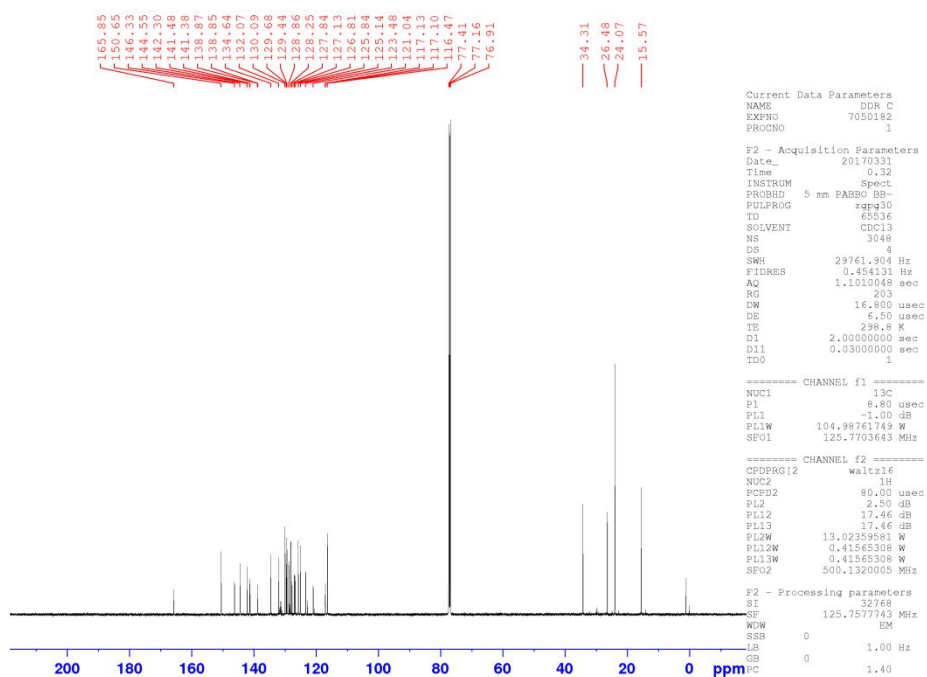

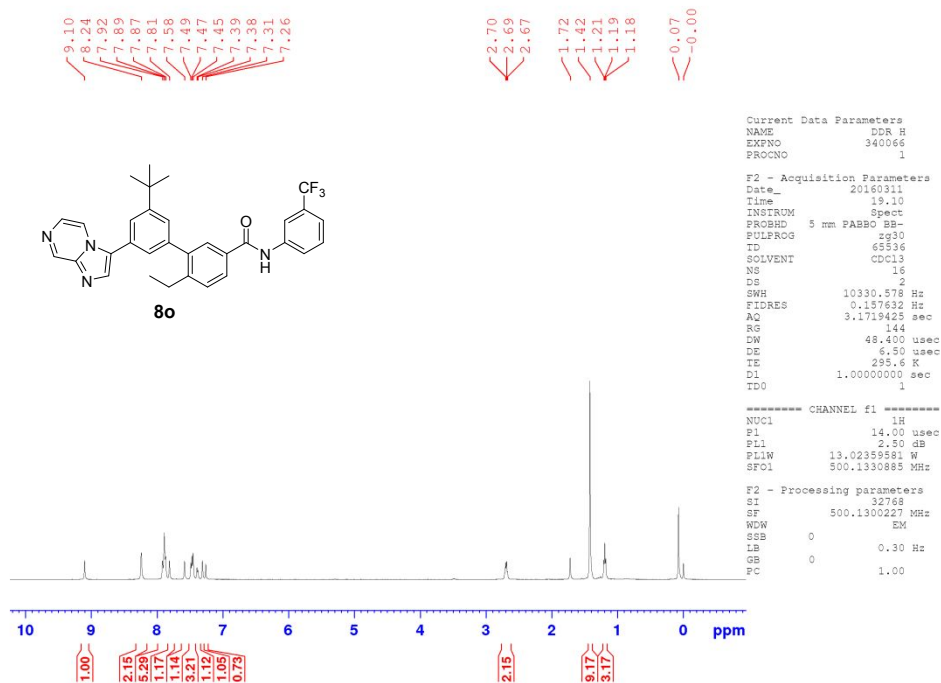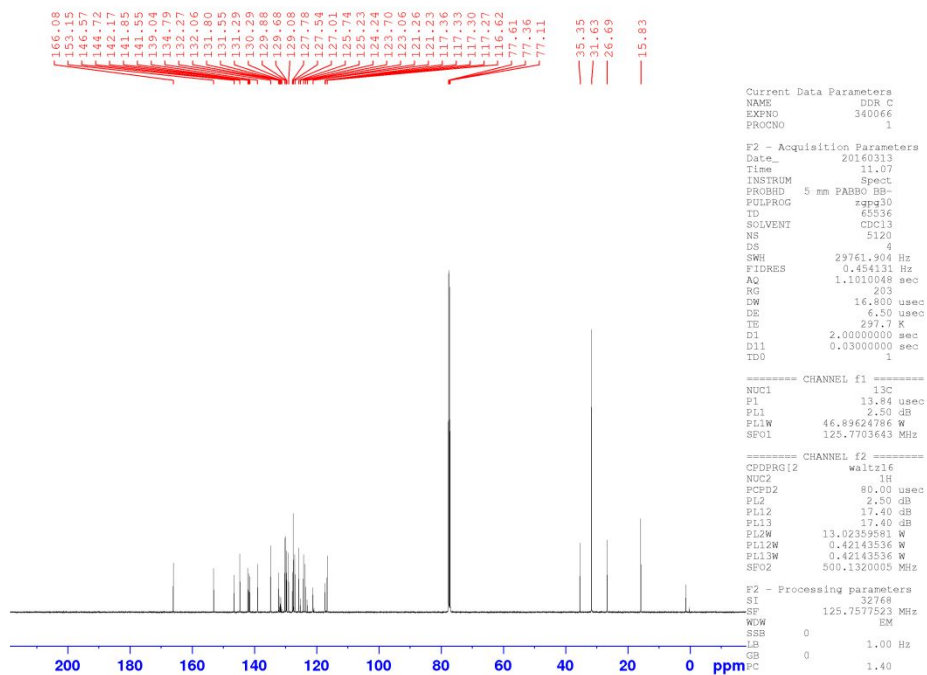

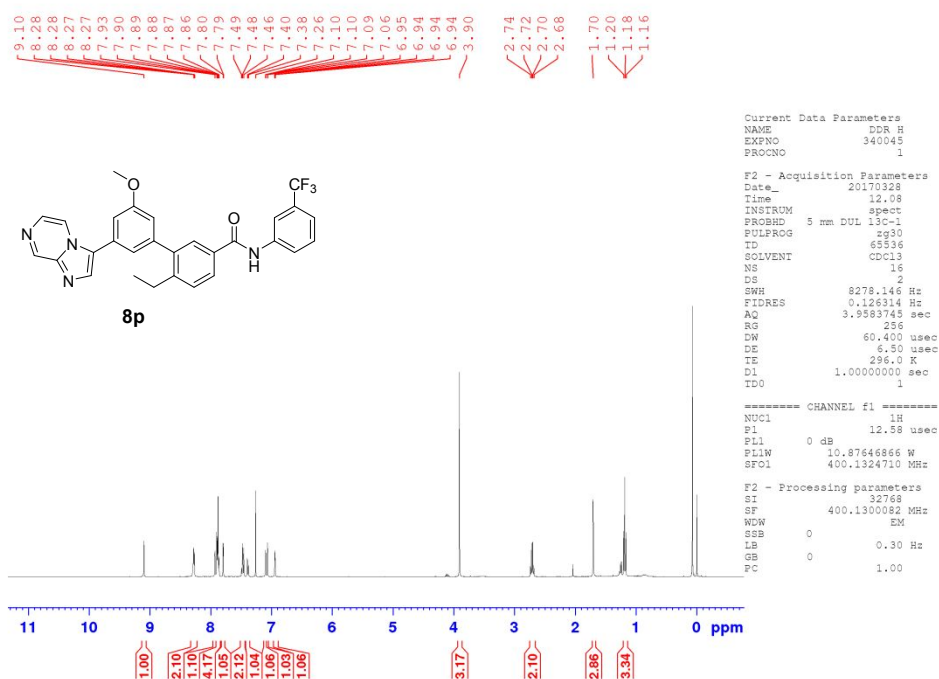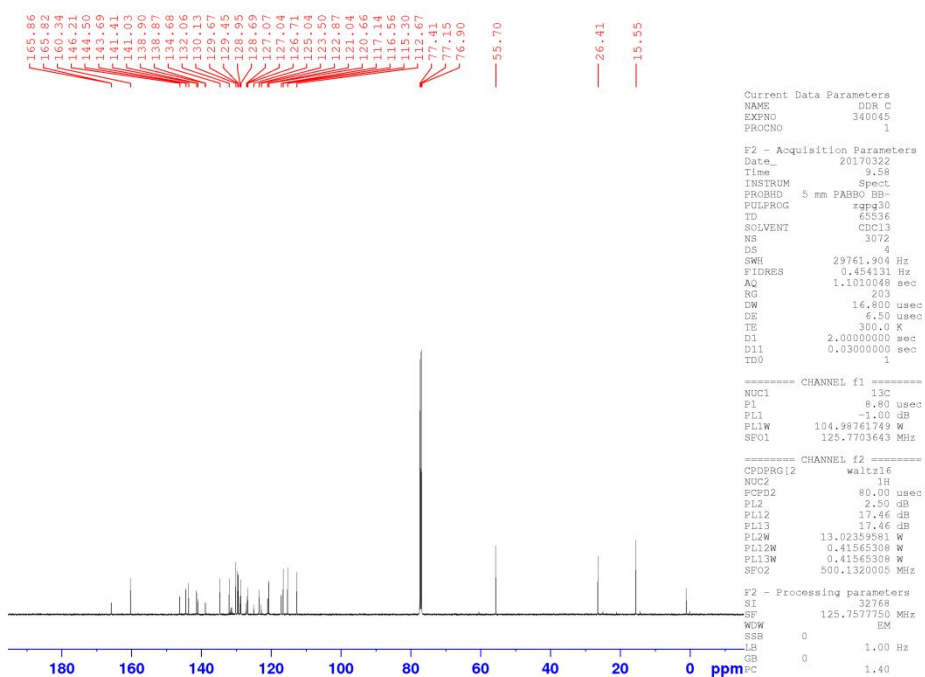

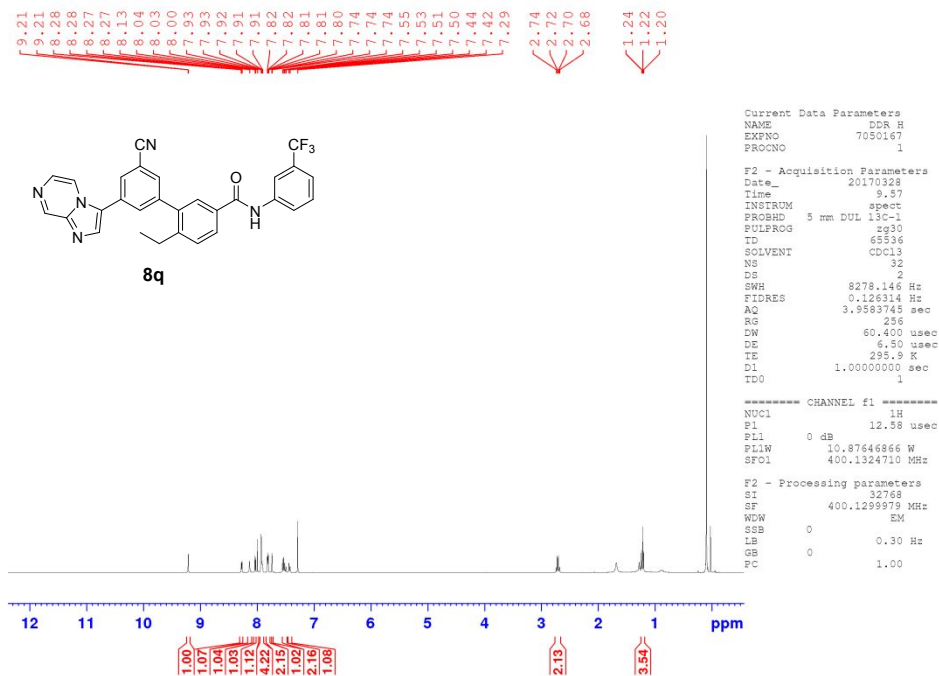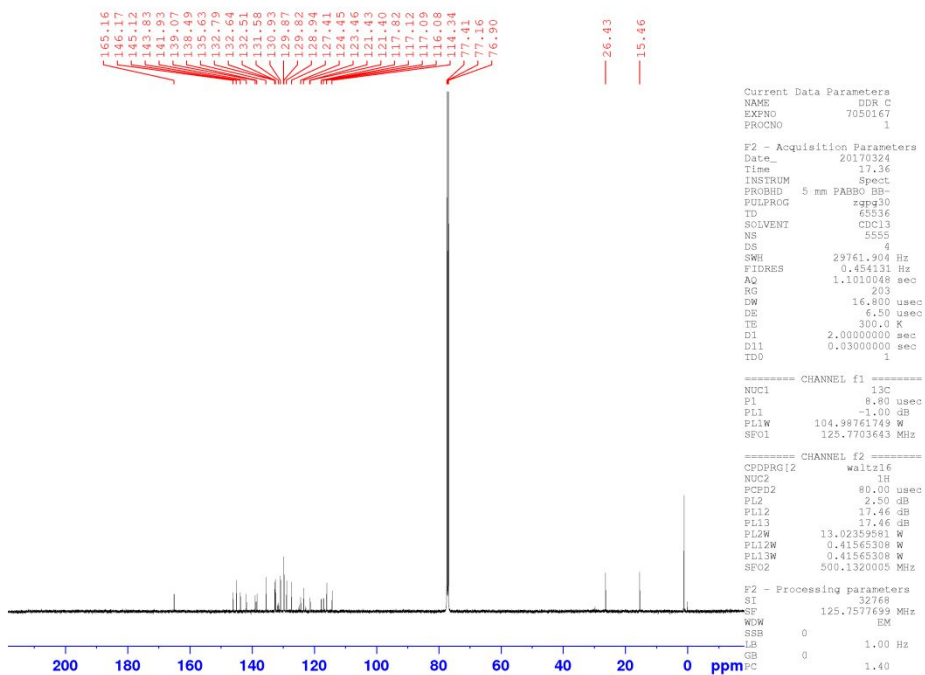

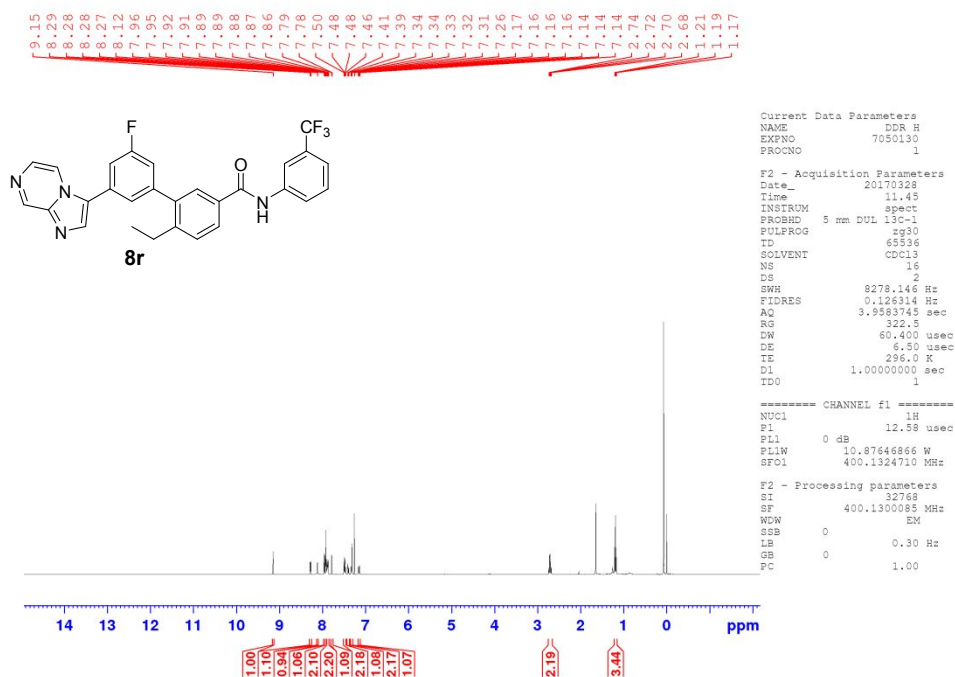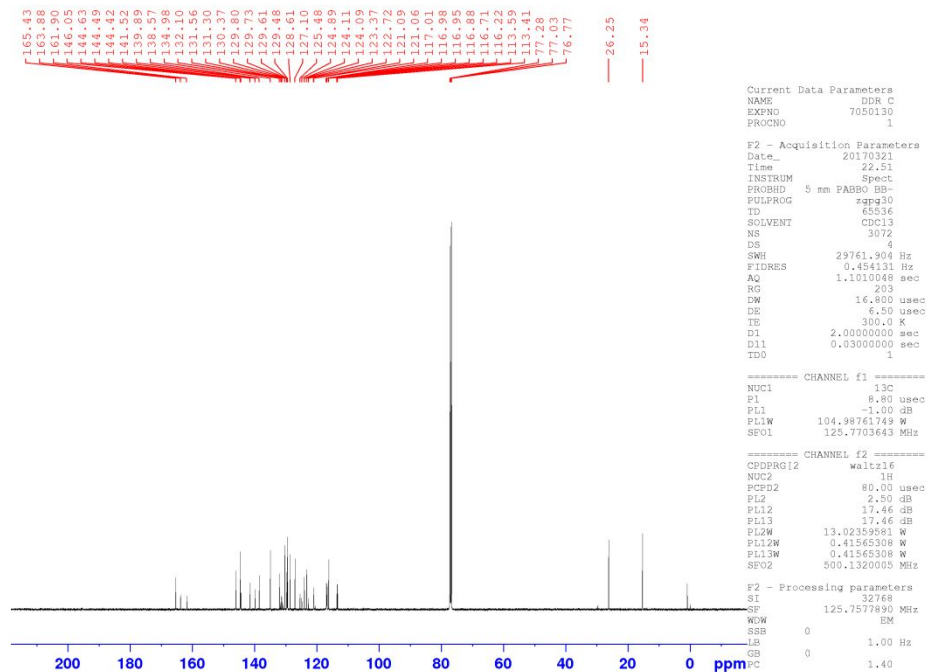

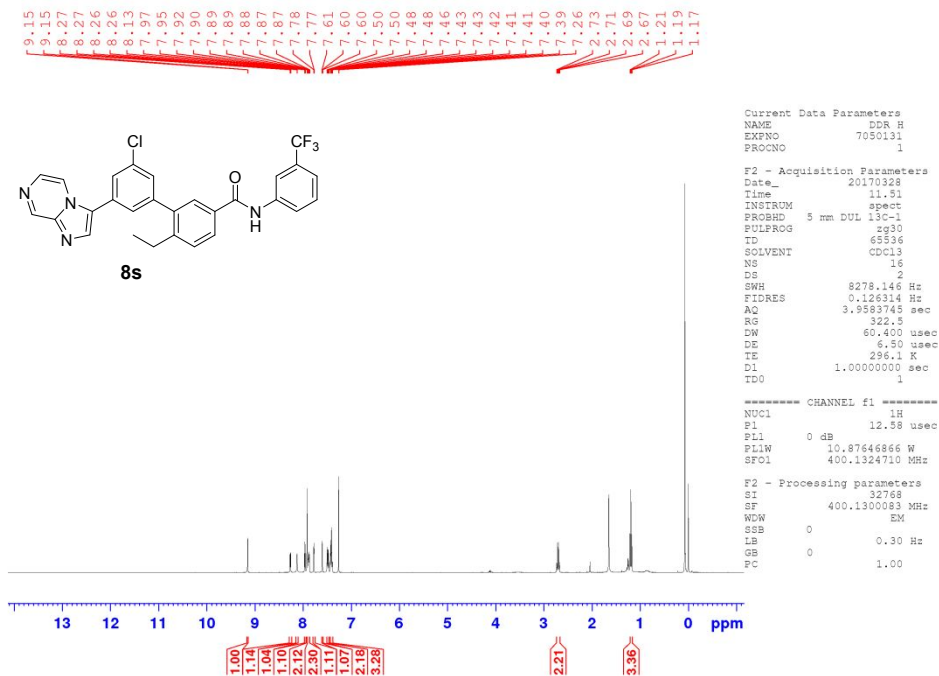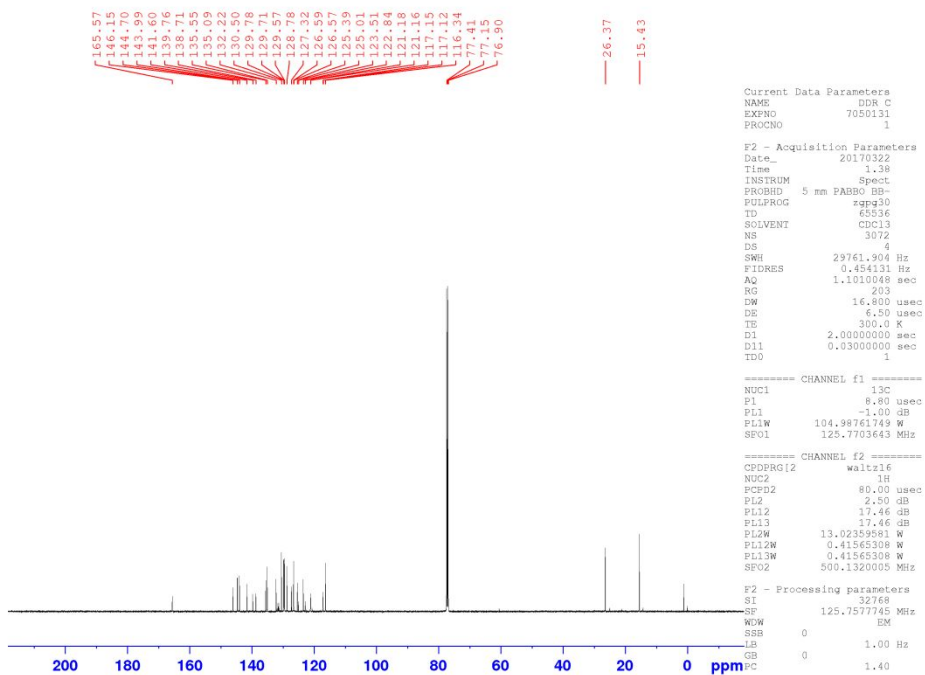

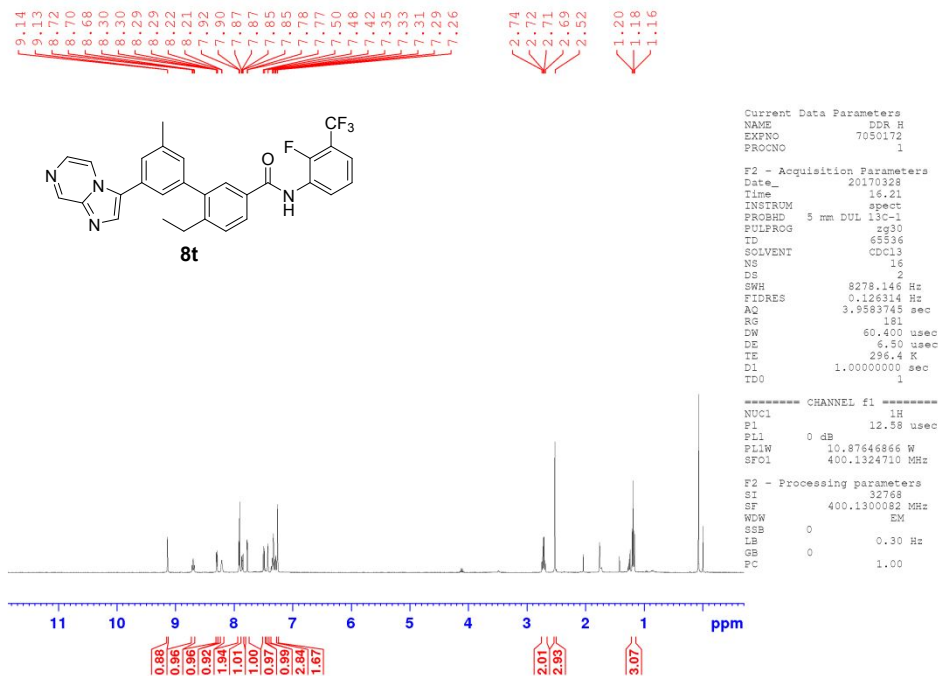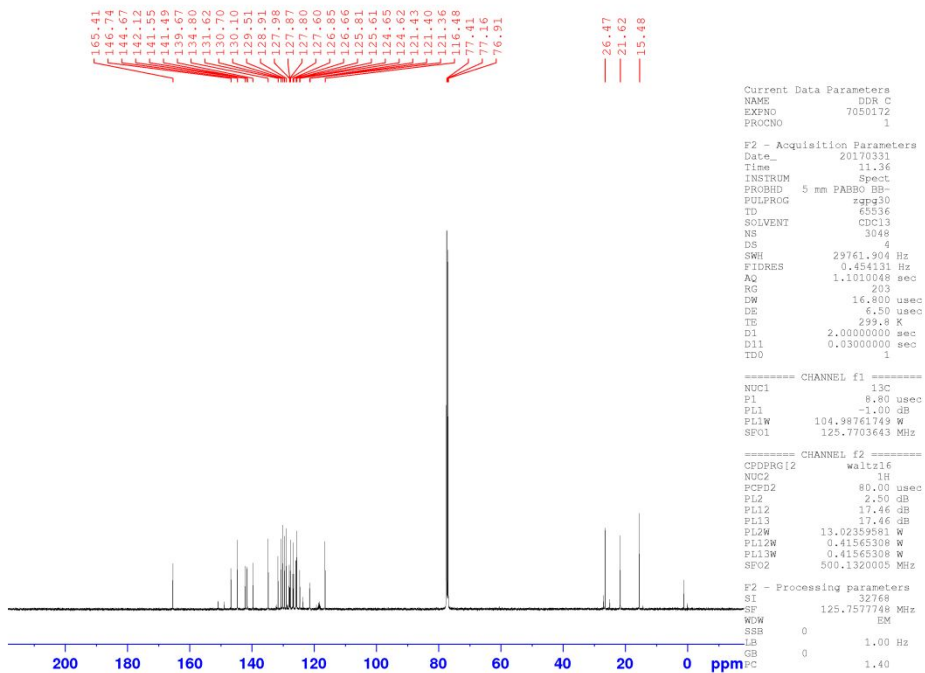

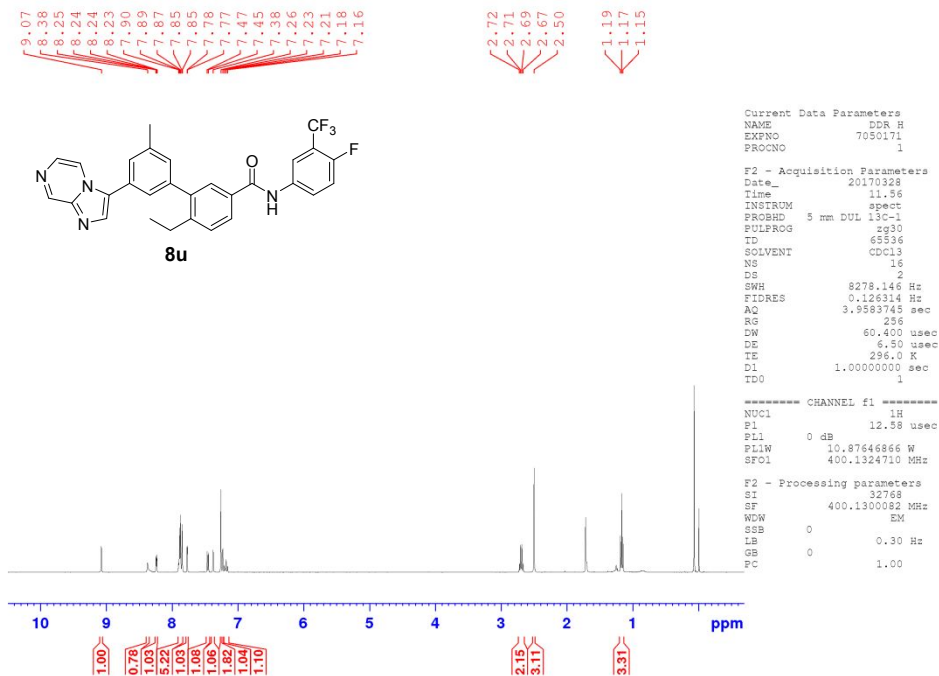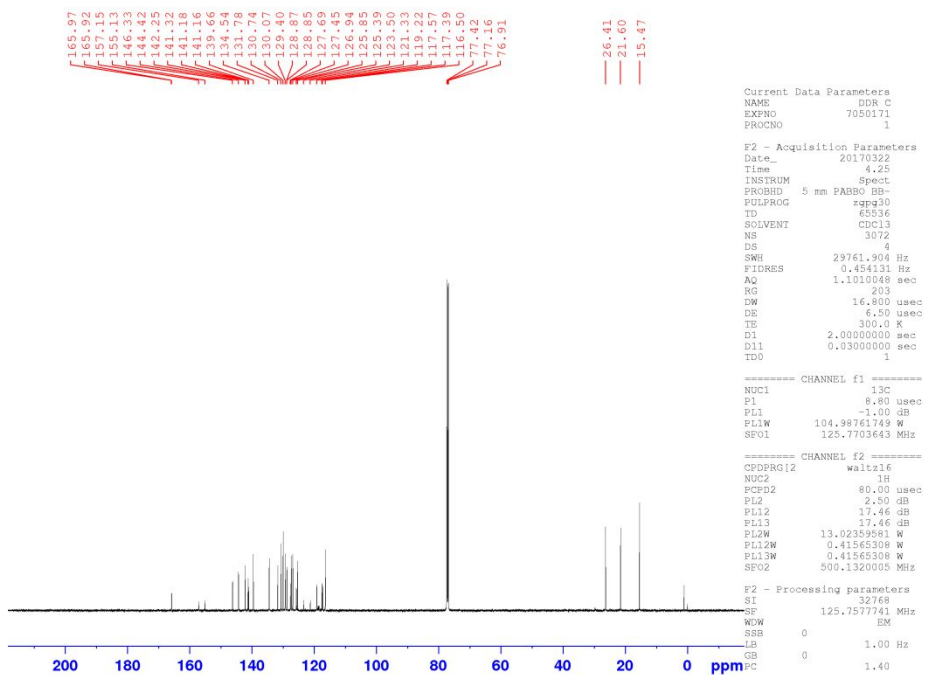

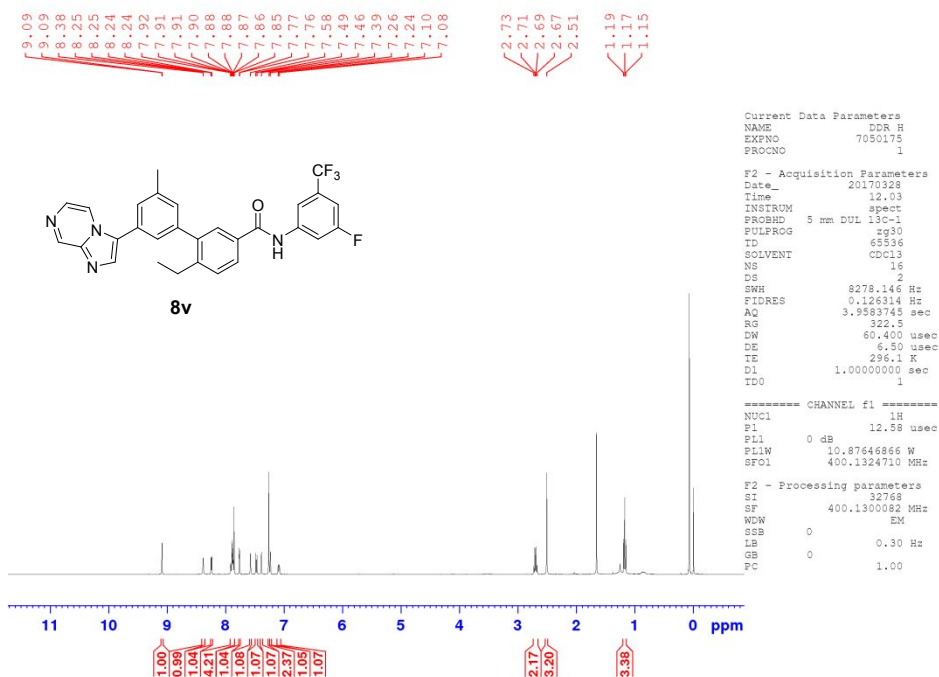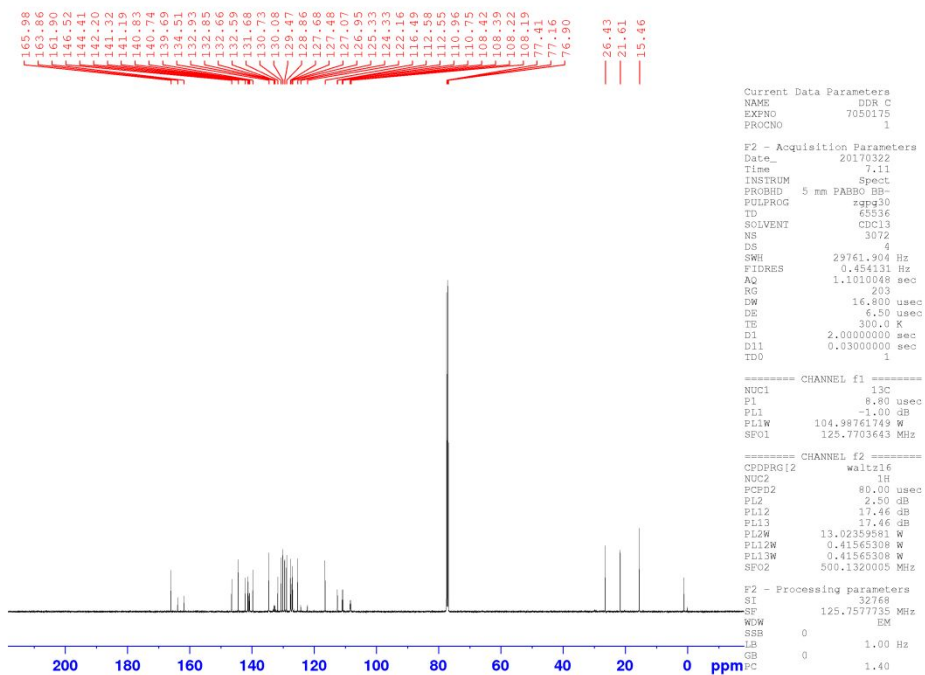

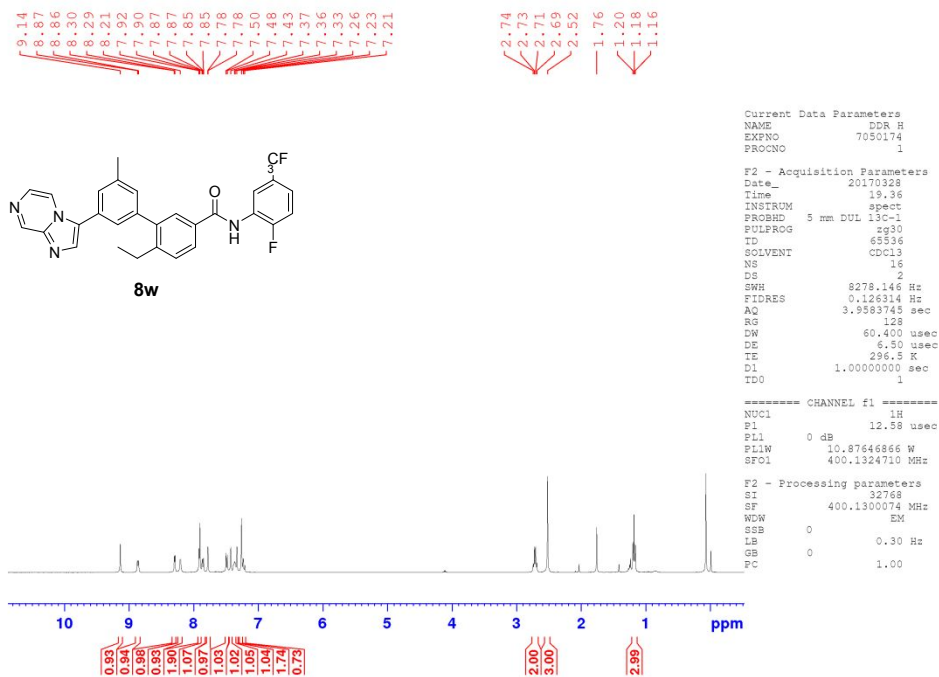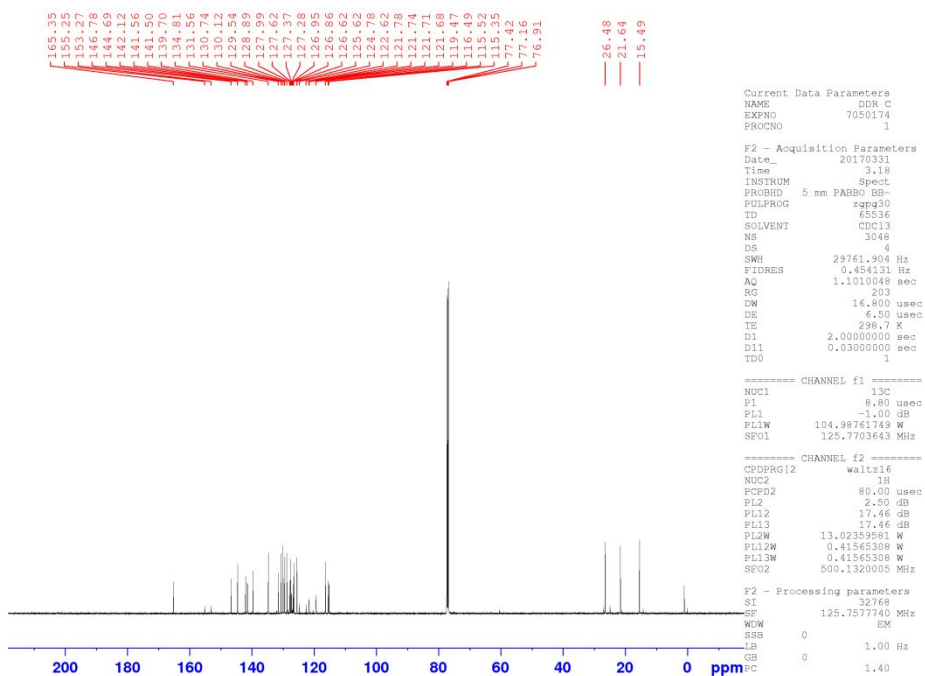

Supplement: Supplementary file 1 [file 20781627]
